# Supplementary material
Source: publisher site journal article supplement (https://www.dovepress.com/get_supplementary_file.php?f=371845.xlsx)
Supplement: Supplementary file 1 [file get_supplementary_file.php]

## Sheet: Supp_material_description
Title	Extended Spectrum Beta-lactamases (ESBL) in Escherichia coli in South America, a systematic review with a One Health perspective
Authors	Carlos Bastidas-Caldes, Daniel Romero-Alvarez, Víctor H. Valdez-Vélez, Roberto D. Morales, Andrés Montalvo-Hernández, Cicero Gómez-Dias, Manuel Calvopiña
Supplementary Tables information description
	Supplementary tables 1.		Number of samples identified (frequencies) and % prevalence of E. coli, E. coli with ESBL phenotype, and E. coli with ESBL genotype in South America from human clinical samples, human healthy carriers, animal, food, and environmental studies. Data from 130 studies included in Systematic review between 1990-2021.
	Supplementary tables 2.		Percentages of different beta-lactamase enzymes identified across South American countries and CTX-M variants for human clinical samples, human healthy carriers, animal, food, and environmental studies. Data from 130 studies included in Systematic review between 1990-2021.
	Supplementary tables 3.		Escherichia coli ST clones found in studies in South American per country and author. Data from 130 studies included in Systematic review between 1990-2021.
	Supplementary tables 4.		Summary Data Base and list of studies included in the systematic review and general data from 130 studies included between 1990-2021
	Supplementary tables 5.		List of additional references included in the systematic review 107-225

## Sheet: Supp_table 1
	Supplementary Table 1. Number of samples identified (frequencies) and % prevalence of E. coli, E. coli with ESBL phenotype, and E. coli with ESBL genotype in South America from human clinical samples, human healthy carriers, animal, food, and environmental studies. Data from 130 studies included in Systematic review between 1990-2021.
	Study Type	Country/Territory	Sample size (N)	E. coli frequency "n"; (% prevalence); [95% CI]	E. coli with ESBL phenotype frequency "n"; (% prevalence); [95% CI]	E. coli with ESBL genotype frequency "n"; (% prevalence); [95% CI]
	HUMAN CLINICAL CASES	TOTAL	185203	28348 (15.3) [0.151—0.155]	9394 (5.1) [0.05—0.052]	3509 (1.9) [0.018—0.02]
		Brazil	51868	9469 (18.3) [0.18—0.186]	2592 (5) [0.048—0.052]	675 (1.3) [0.012—0.014]
		Argentina	17940	3952 (22) [0.214—0.226]	1482 (8.3) [0.079—0.087]	419 (2.3) [0.021—0.025]
		Ecuador	18417	2881 (15.6) [0.151—0.161]	667 (3.6) [0.033—0.039]	640 (3.5) [0.032—0.038]
		Peru	5368	1584 (29.5) [0.283—0.307]	408 (7.6) [0.069—0.083]	574 (10.7) [0.099—0.115]
		Venezuela	16622	3655 (22) [0.214—0.226]	1452 (8.7) [0.083—0.091]	397 (2.4) [0.022—0.026]
		Colombia	16178	3509 (21.7) [0.211—0.223]	1328 (8.2) [0.078—0.086]	368 (2.3) [0.021—0.025]
		Chile	14034	2954 (21) [0.203—0.217]	1276 (9.1) [0.086—0.096]	347 (2.5) [0.022—0.028]
		Bolivia	314	257 (81.8) [0.775—0.861]	134 (42.7) [0.372—0.482]	4 (1.3) [0.005—0.033]
		Uruguay	44462	87 (0.2) [ND]	55 (0.1) [ND]	85 (0.2) [ND]
	HUMAN HEALTHY CARRIERS	TOTAL	7861	1105 (14.1) [0.133—0.149]	490 (6.2) [0.057—0.067]	139 (1.8) [0.015—0.021]
		Ecuador	1004	780 (77.7) [0.751—0.803]	359 (35.8) [0.328—0.388]	18 (1.8) [0.010—0.026]
		Peru	3444	259 (7.5) [0.066—0.084]	77 (2.2) [0.017—0.027]	65 (1.9) [0.014—0.024]
		Bolivia	3262	58 (1.8) [0.013—0.023]	54 (1.7) [0.013—0.021]	48 (1.5) [0.011—0.019]
		French Guiana	151	8 (5.3) [0.027—0.101]	ND	8 (5.3) [0.027—0.101]
	ANIMAL	TOTAL	6616	3607 (54.5) [0.533—0.557]	1418 (21.4) [0.204—0.224]	1195 (18.1) [0.172—0.19]
		Brazil	4372	1679 (38.4) [0.370—0.398]	507 (11.6) [0.107—0.125]	469 (10.7) [0.098—0.116]
		Argentina	347	183 (52.7) [0.474—0.58]	32 (9.2) [0.062—0.122]	44 (12.7) [0.092—0.162]
		Ecuador	567	556 (98.1) [0.97—0.992]	385 (67.9) [0.641—0.717]	250 (44.1) [0.4—0.482]
		Peru	179	176 (98.3) [0.952—0.994]	51 (28.5) [0.219—0.351]	11 (6.1) [0.026—0.096]
		Chile	566	428 (75.6) [0.721—0.791]	210 (37.1) [0.331—0.411]	188 (33.2) [0.293—0.371]
		Uruguay	585	585 (100) [ND]	233 (39.8) [0.358—0.438]	233 (39.8) [0.358—0.438]
	FOOD	TOTAL	1860	1401 (75.3) [0.733—0.773]	193 (10.4) [0.09—0.118]	580 (31.2) [0.291—0.333]
		Brazil	1348	1099 (81.5) [0.794—0.836]	149 (11.1) [0.094—0.128]	278 (20.6) [0.184—0.228]
		Ecuador	512	302 (59) [0.547—0.633]	44 (8.6) [0.062—0.11]	302 (59) [0.547—0.633]
	ENVIRONMENTAL	TOTAL	1517	553 (36.5) [0.341—0.389]	191 (12.6) [0.109—0.143]	187 (12.3) [0.106—0.14]
		Brazil	776	241 (31.1) [0.278—0.344]	123 (15.9) [0.133—0.185]	98 (12.6) [0.103—0.149]
		Ecuador	45	45 (100) [ND]	16 (35.6) [0.216—0.496]	16 (35.6) [0.216—0.496]
		Peru	359	162 (45.1) [0.4—0.502]	26 (7.2) [0.045—0.099]	11 (3.1) [0.013—0.049]
		Colombia	166	77 (46.4) [0.388—0.54]	ND	59 (35.5) [0.282—0.428]
		Bolivia	171	28 (16.4) [0.109—0.219]	26 (15.2) [0.098—0.206]	3 (1.8) [0.006—0.051]
	Note. % prevalence was calculated considering the sample size. ND = Not available data. 95% CI = 95% confidence intervals.

## Sheet: Supp_table 2
Supplemntary Table 2. Percentages of different beta-lactamase enzymes identified across South American countries and CTX-M variants for human clinical samples, human healthy carriers, animal, food, and environmental studies. Data from 130 studies included in Systematic review between 1990-2021.
HUMAN CLINICAL ISOLATIONS
Different beta-lactamase enzymes identified across South American countries in human clinical isolations
			CTX-M		TEM		SHV		TOHO		OXA		AmpC		PER-2
Country	lon	lat	n	Percentage	n	Percentage	n	Percentage	n	Precentage	n	Percentage	n	Percentage	n	Percentage
Argentina	-65.4501	-32.3619	413	97.2	12	2.8	0	0	0	0	0	0	0	0	0	0
Bolivia	-65.059	-16.4576	132	100	0	0	0	0	0	0	0	0	0	0	0	0
Brazil	-51.3709	-10.5913	630	79.9	118	15	29	3.7	1	0.1	8	1	2	0.3	0	0
Chile	-69.752	-26.1045	352	95.2	12	3.2	6	1.6	0	0	0	0	0	0	0	0
Colombia	-73.4022	4.13971	366	89.3	25	6.1	12	2.9	0	0	0	0	7	1.7	0	0
Ecuador	-78.6167	-0.944438	512	88.3	58	10	10	1.7	0	0	0	0	0	0	0	0
French Guiana	-52.9352	4.13971	0	0	0	0	0	0	0	0	0	0	0	0	0	0
Guyana	-58.9319	5.31298	0	0	0	0	0	0	0	0	0	0	0	0	0	0
Paraguay	-58.4105	-23.2365	0	0	0	0	0	0	0	0	0	0	0	0	0	0
Peru	-75.488	-9.80911	421	91.7	27	5.9	2	0.4	0	0	9	2	0	0	0	0
Suriname	-56.0639	4.27008	0	0	0	0	0	0	0	0	0	0	0	0	0	0
Uruguay	-55.8032	-33.1441	79	77.5	11	10.8	1	0.9	0	0	0	0	0	0	11	10.8
Venezuela	-65.9715	7.52915	404	92.8	22	5.1	9	2.1	0	0	0	0	0	0	0	0
CTX-M categories identified across South American countries in human clinical isolations
			CTX-M_UV		CTX-M-1		CTX-M-2		CTX-M-8		CTX-M-9		CTX-M-14		CTX-M-15		CTX-M-24		CTX-M_OO
Country	lon	lat	n	Percentage	n	Percentage	n	Percentage	n	Percentage	n	Percentage	n	Percentage	n	Percentage	n	Percentage	n	Percentage
Argentina	-65.4501	-32.3619	327	79.2	-	-	40	9.7	11	2.7	21	5.1	-	-	-	-	0	0	14	3.3
Bolivia	-65.059	-16.4576	0	0	67	50.8	0	0	0	0	9	6.8	0	0	36	27.3	20	15.1	0	0
Brazil	-51.3709	-10.5913	374	59.4	39	6.2	59	9.4	42	6.7	16	2.5	-	-	82	13	-	-	18	2.8
Chile	-69.752	-26.1045	330	93.8	17	4.8	-	-	0	0	0	0	0	0	-	-	0	0	5	1.4
Colombia	-73.4022	4.13971	323	88.3	14	3.8	0	0	0	0	0	0	0	0	29	7.9	0	0	0	0
Ecuador	-78.6167	-0.944438	323	63.1	71	13.9	0	0	-	-	0	0	-	-	110	21.5	0	0	8	1.5
French Guiana	-52.9352	4.13971	0	0	0	0	0	0	0	0	0	0	0	0	0	0	0	0	0	0
Guyana	-58.9319	5.31298	0	0	0	0	0	0	0	0	0	0	0	0	0	0	0	0	0	0
Paraguay	-58.4105	-23.2365	0	0	0	0	0	0	0	0	0	0	0	0	0	0	0	0	0	0
Peru	-75.488	-9.80911	398	94.5	0	0	-	-	0	0	0	0	0	0	13	3.1	0	0	10	2.4
Suriname	-56.0639	4.27008	0	0	0	0	0	0	0	0	0	0	0	0	0	0	0	0	0	0
Uruguay	-55.8032	-33.1441	0	0	0	0	16	20.2	-	-	-	-	14	17.7	47	59.5	0	0	2	2.6
Venezuela	-65.9715	7.52915	323	80	27	6.7	7	1.7	0	0	0	0	0	0	47	11.6	0	0	0	0
ISOLATIONS MADE ACROSS HUMAN COMMUNITIES
Different beta-lactamase enzymes identified across South American countries
			CTX-M		TEM		SHV		TOHO		OXA		AmpC		PER-2
Country	lon	lat	n	Percentage	n	Percentage	n	Percentage	n	Percentage	n	Percentage	n	Percentage	n	Percentage
Argentina	-65.4501	-32.3619	0	0	0	0	0	0	0	0	0	0	0	0	0	0
Bolivia	-65.059	-16.4576	48	92.3	4	7.7	0	0	0	0	0	0	0	0	0	0
Brazil	-51.3709	-10.5913	0	0	0	0	0	0	0	0	0	0	0	0	0	0
Chile	-69.752	-26.1045	0	0	0	0	0	0	0	0	0	0	0	0	0	0
Colombia	-73.4022	4.13971	0	0	0	0	0	0	0	0	0	0	0	0	0	0
Ecuador	-78.6167	-0.944438	69	100	0	0	0	0	0	0	0	0	0	0	0	0
French Guiana	-52.9352	4.13971	13	92.9	1	7.1	0	0	0	0	0	0	0	0	0	0
Guyana	-58.9319	5.31298	0	0	0	0	0	0	0	0	0	0	0	0	0	0
Paraguay	-58.4105	-23.2365	0	0	0	0	0	0	0	0	0	0	0	0	0	0
Peru	-75.488	-9.80911	65	94.2	4	5.8	0	0	0	0	0	0	0	0	0	0
Suriname	-56.0639	4.27008	0	0	0	0	0	0	0	0	0	0	0	0	0	0
Uruguay	-55.8032	-33.1441	0	0	0	0	0	0	0	0	0	0	0	0	0	0
Venezuela	-65.9715	7.52915	0	0	0	0	0	0	0	0	0	0	0	0	0	0
CTX-M categories identified across South American countries
			CTX-M_UV		CTX-M-1		CTX-M-2		CTX-M-8		CTX-M-9		CTX-M-14		CTX-M-15		CTX-M-24		CTX-M-55		CTX-M_OO
Country	lon	lat	n	Percentage	n	Percentage	n	Percentage	n	Percentage	n	Percentage	n	Percentage	n	Percentage	n	Percentage	n	Percentage	n	Percentage
Argentina	-65.4501	-32.3619	0	0	0	0	0	0	0	0	0	0	0	0	0	0	0	0	0	0	0	0
Bolivia	-65.059	-16.4576	0	0	14	29.2	21	43.7	0	0	12	25	0	0	1	2.1	0	0	0	0	0	0
Brazil	-51.3709	-10.5913	0	0	0	0	0	0	0	0	0	0	0	0	0	0	0	0	0	0	0	0
Chile	-69.752	-26.1045	0	0	0	0	0	0	0	0	0	0	0	0	0	0	0	0	0	0	0	0
Colombia	-73.4022	4.13971	0	0	0	0	0	0	0	0	0	0	0	0	0	0	0	0	0	0	0	0
Ecuador	-78.6167	-0.944438	0	0	0	0	0	0	0	0	0	0	0	0	0	0	0	0	69	100	0	0
French Guiana	-52.9352	4.13971	0	0	6	46.1	2	15.4	5	38.5	0	0	0	0	0	0	0	0	0	0	0	0
Guyana	-58.9319	5.31298	0	0	0	0	0	0	0	0	0	0	0	0	0	0	0	0	0	0	0	0
Paraguay	-58.4105	-23.2365	0	0	0	0	0	0	0	0	0	0	0	0	0	0	0	0	0	0	0	0
Peru	-75.488	-9.80911	0	0	14	21.5	31	47.7	0	0	12	18.5	0	0	1	1.5	7	10.8	0	0	0	0
Suriname	-56.0639	4.27008	0	0	0	0	0	0	0	0	0	0	0	0	0	0	0	0	0	0	0	0
Uruguay	-55.8032	-33.1441	0	0	0	0	0	0	0	0	0	0	0	0	0	0	0	0	0	0	0	0
Venezuela	-65.9715	7.52915	0	0	0	0	0	0	0	0	0	0	0	0	0	0	0	0	0	0	0	0
ISOLATIONS MADE ON FOOD
Different beta-lactamase enzymes identified across South American countries
			CTX-M		TEM		SHV		TOHO		OXA		AmpC		PER-2
Country	lon	lat	n	Percentage	n	Percentage	n	Percentage	n	Percentage	n	Percentage	n	Percentage	n	Percentage
Argentina	-65.4501	-32.3619	0	0	0	0	0	0	0	0	0	0	0	0	0	0
Bolivia	-65.059	-16.4576	0	0	0	0	0	0	0	0	0	0	0	0	0	0
Brazil	-51.3709	-10.5913	218	80.1	22	8.1	16	5.9	0	0	0	0	16	5.9	0	0
Chile	-69.752	-26.1045	0	0	0	0	0	0	0	0	0	0	0	0	0	0
Colombia	-73.4022	4.13971	0	0	0	0	0	0	0	0	0	0	0	0	0	0
Ecuador	-78.6167	-0.944438	165	66.5	82	33.1	1	0.4	0	0	0	0	0	0	0	0
French Guiana	-52.9352	4.13971	0	0	0	0	0	0	0	0	0	0	0	0	0	0
Guyana	-58.9319	5.31298	0	0	0	0	0	0	0	0	0	0	0	0	0	0
Paraguay	-58.4105	-23.2365	0	0	0	0	0	0	0	0	0	0	0	0	0	0
Peru	-75.488	-9.80911	0	0	0	0	0	0	0	0	0	0	0	0	0	0
Suriname	-56.0639	4.27008	0	0	0	0	0	0	0	0	0	0	0	0	0	0
Uruguay	-55.8032	-33.1441	0	0	0	0	0	0	0	0	0	0	0	0	0	0
Venezuela	-65.9715	7.52915	0	0	0	0	0	0	0	0	0	0	0	0	0	0
CTX-M categories identified across South American countries
			CTX-M_UV		CTX-M-1		CTX-M-2		CTX-M-8		CTX-M-9		CTX-M-14		CTX-M-15		CTX-M-24		CTX-M-55		CTX-M_OO
Country	lon	lat	n	Percentage	n	Percentage	n	Percentage	n	Percentage	n	Percentage	n	Percentage	n	Percentage	n	Percentage	n	Percentage	n	Percentage
Argentina	-65.4501	-32.3619	0	0	0	0	0	0	0	0	0	0	0	0	0	0	0	0	0	0	0	0
Bolivia	-65.059	-16.4576	0	0	0	0	0	0	0	0	0	0	0	0	0	0	0	0	0	0	0	0
Brazil	-51.3709	-10.5913	0	0	11	5.1	138	63.3	65	29.8	0	0	0	0	4	1.8	0	0	0	0	0	0
Chile	-69.752	-26.1045	0	0	0	0	0	0	0	0	0	0	0	0	0	0	0	0	0	0	0	0
Colombia	-73.4022	4.13971	0	0	0	0	0	0	0	0	0	0	0	0	0	0	0	0	0	0	0	0
Ecuador	-78.6167	-0.944438	0	0	109	66.1	11	6.7	-	-	0	0	2	1.2	30	18.1	-	-	10	6.1	3	1.8
French Guiana	-52.9352	4.13971	0	0	0	0	0	0	0	0	0	0	0	0	0	0	0	0	0	0	0	0
Guyana	-58.9319	5.31298	0	0	0	0	0	0	0	0	0	0	0	0	0	0	0	0	0	0	0	0
Paraguay	-58.4105	-23.2365	0	0	0	0	0	0	0	0	0	0	0	0	0	0	0	0	0	0	0	0
Peru	-75.488	-9.80911	0	0	0	0	0	0	0	0	0	0	0	0	0	0	0	0	0	0	0	0
Suriname	-56.0639	4.27008	0	0	0	0	0	0	0	0	0	0	0	0	0	0	0	0	0	0	0	0
Uruguay	-55.8032	-33.1441	0	0	0	0	0	0	0	0	0	0	0	0	0	0	0	0	0	0	0	0
Venezuela	-65.9715	7.52915	0	0	0	0	0	0	0	0	0	0	0	0	0	0	0	0	0	0	0	0
ISOLATIONS MADE ON THE ENVIRONMENT
Different beta-lactamase enzymes identified across South American countries
			CTX-M		TEM		SHV		TOHO		OXA		AmpC		PER-2
Country	lon	lat	n	Percentage	n	Percentage	n	Percentage	n	Percentage	n	Percentage	n	Percentage	n	Percentage
Argentina	-65.4501	-32.3619	0	0	0	0	0	0	0	0	0	0	0	0	0	0
Bolivia	-65.059	-16.4576	1	33.3	1	33.3	0	0	0	0	1	33.3	0	0	0	0
Brazil	-51.3709	-10.5913	97	89	6	5.5	3	2.8	1	0.9	1	0.9	1	0.9	0	0
Chile	-69.752	-26.1045	0	0	0	0	0	0	0	0	0	0	0	0	0	0
Colombia	-73.4022	4.13971	72	52.6	60	43.8	5	3.6	0	0	0	0	0	0	0	0
Ecuador	-78.6167	-0.944438	16	100	0	0	0	0	0	0	0	0	0	0	0	0
French Guiana	-52.9352	4.13971	0	0	0	0	0	0	0	0	0	0	0	0	0	0
Guyana	-58.9319	5.31298	0	0	0	0	0	0	0	0	0	0	0	0	0	0
Paraguay	-58.4105	-23.2365	0	0	0	0	0	0	0	0	0	0	0	0	0	0
Peru	-75.488	-9.80911	11	100	0	0	0	0	0	0	0	0	0	0	0	0
Suriname	-56.0639	4.27008	0	0	0	0	0	0	0	0	0	0	0	0	0	0
Uruguay	-55.8032	-33.1441	0	0	0	0	0	0	0	0	0	0	0	0	0	0
Venezuela	-65.9715	7.52915	0	0	0	0	0	0	0	0	0	0	0	0	0	0
CTX-M categories identified across South American countries
			CTX-M_UV		CTX-M-1		CTX-M-2		CTX-M-3		CTX-M-8		CTX-M-9		CTX-M-14		CTX-M-15		CTX-M-24		CTX-M-55		CTX-M_OO
Country	lon	lat	n	Percentage	n	Percentage	n	Percentage	n	Percentage	n	Percentage	n	Percentage	n	Percentage	n	Percentage	n	Percentage	n	Percentage	n	Percentage
Argentina	-65.4501	-32.3619	0	0	0	0	0	0	0	0	0	0	0	0	0	0	0	0	0	0	0	0	0	0
Bolivia	-65.059	-16.4576	0	0	0	0	0	0	1	100	0	0	0	0	0	0	0	0	0	0	0	0	0	0
Brazil	-51.3709	-10.5913	42	43.3	14	14.4	23	23.7	0	0	12	12.4	0	0	-	-	4	4.1	0	0	-	-	2	2.1
Chile	-69.752	-26.1045	0	0	0	0	0	0	0	0	0	0	0	0	0	0	0	0	0	0	0	0	0	0
Colombia	-73.4022	4.13971	0	0	49	68.1	5	6.9	0	0	6	8.3	12	16.7	0	0	0	0	0	0	0	0	0	0
Ecuador	-78.6167	-0.944438	0	0	4	25	0	0	1	6.3	0	0	0	0	0	0	0	0	3	18.7	8	50	0	0
French Guiana	-52.9352	4.13971	0	0	0	0	0	0	0	0	0	0	0	0	0	0	0	0	0	0	0	0	0	0
Guyana	-58.9319	5.31298	0	0	0	0	0	0	0	0	0	0	0	0	0	0	0	0	0	0	0	0	0	0
Paraguay	-58.4105	-23.2365	0	0	0	0	0	0	0	0	0	0	0	0	0	0	0	0	0	0	0	0	0	0
Peru	-75.488	-9.80911	0	0	0	0	8	72.7	1	9.1	0	0	0	0	0	0	0	0	2	18.2	0	0	0	0
Suriname	-56.0639	4.27008	0	0	0	0	0	0	0	0	0	0	0	0	0	0	0	0	0	0	0	0	0	0
Uruguay	-55.8032	-33.1441	0	0	0	0	0	0	0	0	0	0	0	0	0	0	0	0	0	0	0	0	0	0
Venezuela	-65.9715	7.52915	0	0	0	0	0	0	0	0	0	0	0	0	0	0	0	0	0	0	0	0	0	0
ISOLATIONS MADE ON ANIMALS
Different beta-lactamase enzymes identified across South American countries
			CTX-M		TEM		SHV		TOHO		OXA		AmpC		PER-2
Country	lon	lat	n	Percentage	n	Percentage	n	Percentage	n	Percentage	n	Percentage	n	Percentage	n	Percentage
Argentina	-65.4501	-32.3619	30	69.8	0	0	0	0	0	0	0	0	13	30.2	0	0
Bolivia	-65.059	-16.4576	0	0	0	0	0	0	0	0	0	0	0	0	0	0
Brazil	-51.3709	-10.5913	316	60	155	29.4	26	4.9	0	0	0	0	30	5.7	0	0
Chile	-69.752	-26.1045	196	94.2	2	1	2	1	0	0	0	0	0	0	8	3.8
Colombia	-73.4022	4.13971	0	0	0	0	0	0	0	0	0	0	0	0	0	0
Ecuador	-78.6167	-0.944438	176	52.5	76	22.7	17	5.1	0	0	0	0	66	19.7	0	0
French Guiana	-52.9352	4.13971	0	0	0	0	0	0	0	0	0	0	0	0	0	0
Guyana	-58.9319	5.31298	0	0	0	0	0	0	0	0	0	0	0	0	0	0
Paraguay	-58.4105	-23.2365	0	0	0	0	0	0	0	0	0	0	0	0	0	0
Peru	-75.488	-9.80911	11	100	0	0	0	0	0	0	0	0	0	0	0	0
Suriname	-56.0639	4.27008	0	0	0	0	0	0	0	0	0	0	0	0	0	0
Uruguay	-55.8032	-33.1441	39	58.2	9	13.4	0	0	0	0	0	0	19	28.4	0	0
Venezuela	-65.9715	7.52915	0	0	0	0	0	0	0	0	0	0	0	0	0	0
CTX-M categories identified across South American countries
			CTX-M_UV		CTX-M-1		CTX-M-2		CTX-M-3		CTX-M-8		CTX-M-9		CTX-M-14		CTX-M-15		CTX-M-24		CTX-M-55		CTX-M-65		CTX-M-103		CTX-M_OO
Country	lon	lat	n	Percentage	n	Percentage	n	Percentage	n	Percentage	n	Percentage	n	Percentage	n	Percentage	n	Percentage	n	Percentage	n	Percentage	n	Percentage	n	Percentage	n	Percentage
Argentina	-65.4501	-32.3619	0	0	4	13.3	6	20	0	0	17	56.7	0	0	1	3.3	2	6.7	0	0	0	0	0	0	0	0	0	0
Bolivia	-65.059	-16.4576	0	0	0	0	0	0	0	0	0	0	0	0	0	0	0	0	0	0	0	0	0	0	0	0	0	0
Brazil	-51.3709	-10.5913	18	5.7	19	6	127	40.2	0	0	74	23.4	-	-	-	-	71	22.5	0	0	-	-	0	0	0	0	7	2.2
Chile	-69.752	-26.1045	0	0	124	63.3	14	7.1	-	-	0	0	8	4.1	0	0	38	19.4	0	0	0	0	0	0	11	5.6	1	0.5
Colombia	-73.4022	4.13971	0	0	0	0	0	0	0	0	0	0	0	0	0	0	0	0	0	0	0	0	0	0	0	0	0	0
Ecuador	-78.6167	-0.944438	99	56.2	50	28.4	11	6.2	2	1.1	0	0	0	0	-	-	4	2.3	0	0	4	2.3	3	1.7	-	-	3	1.8
French Guiana	-52.9352	4.13971	0	0	0	0	0	0	0	0	0	0	0	0	0	0	0	0	0	0	0	0	0	0	0	0	0	0
Guyana	-58.9319	5.31298	0	0	0	0	0	0	0	0	0	0	0	0	0	0	0	0	0	0	0	0	0	0	0	0	0	0
Paraguay	-58.4105	-23.2365	0	0	0	0	0	0	0	0	0	0	0	0	0	0	0	0	0	0	0	0	0	0	0	0	0	0
Peru	-75.488	-9.80911	0	0	0	0	0	0	0	0	0	0	0	0	0	0	11	100	0	0	0	0	0	0	0	0	0	0
Suriname	-56.0639	4.27008	0	0	0	0	0	0	0	0	0	0	0	0	0	0	0	0	0	0	0	0	0	0	0	0	0	0
Uruguay	-55.8032	-33.1441	0	0	0	0	7	18	0	0	22	56.4	0	0	7	18	2	5.1	0	0	1	2.5	0	0	0	0	0	0
Venezuela	-65.9715	7.52915	0	0	0	0	0	0	0	0	0	0	0	0	0	0	0	0	0	0	0	0	0	0	0	0	0	0
***ACROSS ALL THE TABLES
CTX-M_UV =	CTX-M (unspecified variants)
CTX-M_OO =	Others variants of CTX-M (includes CTX-M enzymes < 1% of prevalence)

## Sheet: Supp_table 3
	Supplementary Table 3. Escherichia coli ST clones found in studies in South American per country and author. Data from 130 studies included in Systematic review between 1990-2021.
	ST Clones (n= 97)	Country	Author	Reference number in the main text
	ST 131 (n=15)	Brazil	(Borges et al., 2019)	162
			(Bartley et al., 2019)	137
			(Campos et al., 2018)	152
			(Gonçalves et al., 2016)	153
			(Peirano et al., 2011)	103
		Ecuador	(Zurita et al., 2020)	129
			(Zurita et al., 2019)	120
			(Chiluisa et al., 2018)	146
		Chile	(Hernández et al., 2013)	5
			(Báez et al., 2015)	220
		Colombia	(Aristizábal-Hoyos et al., 2019)	113
			(Blanco et al., 2016)	149
		Argentina	(Faccone et al., 2019)	110
			(Sennati et al., 2012)	208
		Uruguay	(Vignoli et al., 2016)	151
	ST10 (n= 9)
			(Koga et al., 2019)	46
			(Fernandes et al., 2020)	123
		Brazil	(Borges et al., 2019)	162
			(Campos et al., 2018)	152
			(Gonçalves et al., 2016)	153
		Ecuador	(Zurita et al., 2019)	120
		French Guiana	(Woerther et al., 2013)	106
		Uruguay	(Bado et al., 2016)	165
		Chile	(Hernández et al., 2013)	5
	ST405 (n= 4)
		Uruguay	(Vignoli et al., 2016)	151
			(Bado et al., 2016)	165
		Brazil	(Campos et al., 2018)	152
		Chile	(Hernández et al., 2013)	5
	ST648 (n= 4)
			(Batalha de Jesus et al., 2019)	127
			(Campos et al., 2018)	152
		Brazil
			(Gonçalves et al., 2016)	153
			(Fernandes et al., 2018)	123
	ST38 (n= 4)
		Brazil	(de Carvalho et al., 2020)	117
			(Fernandes et al., 2020)	123
			(Gonçalves et al., 2016)	153
		Chile	(Hernández et al., 2013)	5
	ST410 (n=3)
		Ecuador	(Zurita et al., 2020)	129
			(Ortega et al., 2018)	131
		Brazil	(Peirano et al., 2011)	103
	ST744 (n= 3)
		Brazil	(Koga et al., 2019)	46
			(de Carvalho et al., 2020)	117
		Ecuador	(Zurita et al., 2020)	129
	ST90 (n= 2)
			(Melo et al., 2018)	61
		Brazil
			(Sartori et al., 2017)	172
	ST117 (n= 2)
			(Koga et al., 2019)	46
		Brazil
			(Borges et al., 2019)	162
	ST155 (n= 2)
			(Fernandes et al., 2020)	123
		Brazil
			(Botelho et al., 2020)	141
	ST506 (n= 1)
		Brazil	(Bartley et al., 2019)	137
	ST476 (n= 1)
		Brazil	(Bartley et al., 2019)	137
	ST539 (n= 1)
		Brazil	(Bartley et al., 2019)	137
	ST340 (n= 1)
		Brazil	(Bartley et al., 2019)	137
	ST471 (n= 1)
		Brazil	(Sellera et al., 2018)	64
	ST345 (n= 1)
		Brazil	(Fuentes et al., 2019)	125
	ST32 (n= 1)
		Brazil	(Fuentes et al., 2019)	125
	ST2705 (n= 1)
		Brazil	(Fuentes et al., 2019)	125
	ST354 (n= 1)
		Brazil	(Koga et al., 2019)	46
	ST317 (n= 1)
		Brazil	(Koga et al., 2019)	46
	ST93 (n= 1)
		Brazil	(Koga et al., 2019)	46
	ST448 (n= 1)
		Brazil	(Koga et al., 2019)	46
	ST350 (n= 1)
		Brazil	(Koga et al., 2019)	46
	ST295 (n= 1)
		Brazil	(Koga et al., 2019)	46
	ST57 (n= 1)
		Brazil	(Koga et al., 2019)	46
	ST212 (n= 1)
		Brazil	(de Carvalho et al., 2020)	117
	ST58 (n= 1)
		Brazil	(de Carvalho et al., 2020)	117
	ST125 (n= 1)
		Brazil	(de Carvalho et al., 2020)	117
	ST115 (n= 1)
		Brazil	(de Carvalho et al., 2020)	117
	ST128 (n= 1)
		Brazil	(Fernandes et al., 2020)	179
	ST69 (n= 1)
		Brazil	(Borges et al., 2019)	41
	ST457 (n= 1)
		Brazil	(Melo et al., 2018)	61
	ST973 (n= 1)
		Brazil	(Melo et al., 2018)	61
	ST254 (n= 1)
		Brazil	(Melo et al., 2018)	61
	ST115 (n= 1)
		Brazil	(Botelho et al., 2020)	141
	ST602 (n= 1)
		Brazil	(Botelho et al., 2020)	141
	ST112 (n= 1)
		Brazil	(Botelho et al., 2020)	141
	ST325 (n= 1)
		Brazil	(Botelho et al., 2020)	141
	ST2 (n= 1)
		Peru	(Benavides et al., 2018)	118
	ST305 (n= 1)
		Peru	(Benavides et al., 2018)	118
	ST472 (n= 1)
		Peru	(Benavides et al., 2018)	118
	ST716 (n= 1)
		Peru	(Benavides et al., 2018)	118
	ST721 (n= 1)
		Peru	(Benavides et al., 2018)	118
	ST21 (n= 1)
		Peru	(Benavides et al., 2018)	118
	ST356 (n= 1)
		Peru	(Benavides et al., 2018)	118
	ST466 (n= 1)
		Peru	(Benavides et al., 2018)	118
	ST479 (n= 1)
		Peru	(Benavides et al., 2018)	118
	ST849 (n= 1)
		Peru	(Benavides et al., 2018)	118
	ST850 (n= 1)
		Peru	(Benavides et al., 2018)	118
	ST851 (n= 1)
		Peru	(Benavides et al., 2018)	118
	ST584 (n= 1)
		Uruguay	(Umpiérrez et al., 2017)	133
	ST584 (n= 1)
		Uruguay	(Umpiérrez et al., 2017)	133
	ST584 (n= 1)
		Uruguay	(Umpiérrez et al., 2017)	133
	ST584 (n= 1)
		Uruguay	(Umpiérrez et al., 2017)	133
	ST48 (n= 1)
		Chile	(Hernández et al., 2012)	5
	ST167 (n= 1)
		Ecuador	(Ortega et al., 2020)	48
	ST44 (n= 1)
		Ecuador	(Ortega et al., 2018)	131
	ST23 (n= 1)
		Ecuador	(Zurita et al., 2019)	120
	ST14 (n= 1)
		Ecuador	(Zurita et al., 2019)	120

## Sheet: Supp_table 4
Supplementary Table 4. Sumary Data Base and list of estudies included in the systematyc review and general data from 130 studies included in Systematic review between 1990-2021 used in this Sistematic review.
Author	Year	Country	Sample	Human clinic: Inpatient / Outpatient sample	Sample origen	Sample size (n)	E. coli Prevalence	E. coli with ESBL phenotype	E. coli with ESBL genothype		Type of ESBLs																														Detection methods		Clones of importance	Link
										CTX-M (no variant)	CTX-M-1	CTX-M-14	CTX-M-24	CTX-M-15	CTX-M-55	CTX-M-65	CTX-M-2	CTX-M-3	CTX-M-27	CTX-M-30	CTX-M-8	CTX-M-9	CTX-M-103	SHV (no variant)	SHV-1	SHV-2	SHV-5	SHV-12	SHV-153	Tipo TEM (no variant)	TEM-1	TEM-5	TEM-116	TEM-163	TEM-176	PER-2	OXA-1	TOHO-1	CMY-2	AmpC (no variant)	Phenotipic	Molecular
Ana Paula Daga, Vanessa Lumi Koga, João Gabriel Material Soncini, Caroline Martins de Matos, Marcia Regina Eches Perugini, Marsileni Pelisson, Renata Katsuko T. Kobayashi, Eliana Carolina Vespero	2019	Brazil	Human clinic	Inpatient	blood	48	48	20	20		7			5								8																			Disc diffusion	PCR		https://www.frontiersin.org/articles/10.3389/fcimb.2019.00191/full#F1
Josman Dantas Palmeira, Marisa Haenni, Véronique Metayer, Jean-Yves Madec, Helena Maria Neto Ferreira	2020	Brazil	Animal		feces	191	191	40	40					3			4				25					8															Disc diffusion	PCR		https://www.sciencedirect.com/science/article/pii/S0378113520300523?via%3Dihub
David Ortega-Paredes, Marco Haro, Paula Leoro-Garzón, Pedro Barba, Karen Loaiza, Francisco Mora, Martha Fors, Christian Vinueza-Burgos, Esteban Fernández-Moreira	2019	Ecuador	Animal		feces	50	50	23	18			1		4	4	3	2	2	1				1																		Disc diffusion	PCR		https://www.sciencedirect.com/science/article/pii/S2213716519300918?via%3Dihub
Faccone D, Moredo FA, Giacoboni GI, Albornoz E, Alarcón L, Nievas VF, Corso A	2019	Argentina	Animal		feces	31	34		24		4						2				17																				Disc diffusion	PCR	ST131	https://www.sciencedirect.com/science/article/abs/pii/S2213716519300803?via%3Dihub
Vinueza-Burgos C, Ortega-Paredes D, Narváez C, De Zutter L, Zurita J	2019	Ecuador	Animal		feces	384	384	362	110	99																	12		2		53				3					66	Disc diffusion	PCR, Sequencing		https://journals.plos.org/plosone/article?id=10.1371/journal.pone.0207567
Cunha MP, Oliveira MC, Oliveira MG, Menão MC, Knöbl T	2019	Brazil	Animal		feces	107	107	3	3								1				2																				MIC	PCR, Sequencing		https://jidc.org/index.php/journal/article/view/32087078/2160
Aristizábal-Hoyos AM, Rodríguez EA, Arias L, Jiménez JN	2019	Colombia	Environmental		waste water	4	4		4		49						5				6	12		5						60												PCR, Sequencing	ST131	https://www.sciencedirect.com/science/article/pii/S0301479719306917?via%3Dihub
Rumi MV, Mas J, Elena A, Cerdeira L, Muñoz ME, Lincopan N, Gentilini ÉR, Di Conza J, Gutkind G	2019	Argentina	Animal		urine, secretion, tissues, skin, wound, vaginal swab, respiratory sample	216	54	20	20			1		2			4																						13		Disc diffusion, MIC	PCR, Sequencing		https://pubmed.ncbi.nlm.nih.gov/30827392/
Koga VL, Maluta RP, da Silveira WD, Ribeiro RA, Hungria M, Vespero EC, Nakazato G, Kobayashi RKT	2019	Brazil	Food		chicken meat	121	121	8	8																															14	Disc diffusion, MALDI-TOF	PCR, Sequencing	ST354, ST744, ST3177, ST10, ST93, ST448, ST350, ST295, ST57, ST117	https://bmcmicrobiol.biomedcentral.com/articles/10.1186/s12866-019-1550-3
			Human clinic	Outpatient	urine, tissues, secretion	6	6	6	6
Hoepers PG, Silva PL, Rossi DA, Valadares Júnior EC, Ferreira BC, Zuffo JP, Koerich PK, Fonseca BB	2018	Brazil	Animal		respiratory sample	364	90		88								27				8			1						62												Microarrays		https://pubmed.ncbi.nlm.nih.gov/29737191/
Chavez MV, Caicedo LD, Castillo JE	2019	Colombia	Environmental		waste water	162	73		55													x																			Disc diffusion	PCR		https://www.hindawi.com/journals/ijmicro/2019/1375060/
de Carvalho MPN, Fernandes MR, Sellera FP, Lopes R, Monte DF, Hippólito AG, Milanelo L, Raso TF, Lincopan N	2020	Brazil	Animal		feces	90	90	8	8			2		1	3		2														4										Disc diffusion, MALDI-TOF	PCR, Sequencing	ST212, ST744, ST58, ST1251, ST1158, ST38	https://onlinelibrary.wiley.com/doi/full/10.1111/tbed.13558
Benavides JA, Shiva C; Virhuez M, Tello C, Appelgren A, Vendrell J, Solassol J, Godreuil S, Streicker DG	2018	Peru	Animal		feces	118	11		11					11																												PCR, Sequencing	ST2, ST305, ST472, ST716, ST721, ST21, ST356, ST466, ST479, ST849, ST850, ST851	https://onlinelibrary.wiley.com/doi/full/10.1111/zph.12456
Guzmán M, Salazar E, Cordero V, Castro A, Villanueva A, Rodulfo H, De Donato M	2019	Venezuela	Human clinic	Outpatient	urine	103	103	21	21		4						5							6						17											Disc diffusion	PCR		https://revistabiomedica.org/index.php/biomedica/article/view/4030/4318
Zurita J, Solís MB, Ortega-Paredes D, Barba P, Paz Y Miño A, Sevillano G	2019	Ecuador	Human clinic	Inpatient	blood	4354	181		57			6		49																												PCR	ST10, ST23, ST131, ST14	https://pubmed.ncbi.nlm.nih.gov/31077859/
Sfaciotte RA, Parussolo L, Melo FD, Wildemann P, Bordignon G, Israel ND, Leitzke M, Wosiacki SR, Salbego FZ, da Costa UM, Ferraz SM	2020	Brazil	Animal		feces	224	73	73	50																					50											Disc diffusion	PCR		https://www.liebertpub.com/doi/10.1089/mdr.2020.0043?url_ver=Z39.88-2003&rfr_id=ori:rid:crossref.org&rfr_dat=cr_pub%20%200pubmed
Crecencio RB, Brisola MC, Bitner D, Frigo A, Rampazzo L, Borges KA, Furian TQ, Salle CTP, Moraes HLS, Faria GA, Da Silva AS, Stefani LM	2020	Brazil	Food		meat chicken	150	88	15	15								1								7						11										Disc diffusion	PCR		https://pubmed.ncbi.nlm.nih.gov/32389829/
Fernandes MR, Sellera FP, Moura Q, Esposito F, Sabino CP, Lincopan N	2020	Brazil	Environmental		natural water bodies	11	4	4	4			1		1	1						1																1				VITEK	PCR	ST10, ST38, ST155, ST1284	https://www.sciencedirect.com/science/article/abs/pii/S0025326X19308458?via%3Dihub
Ortega-Paredes D, de Janon S, Villavicencio F, Ruales KJ, De La Torre K, Villacís JE, Wagenaar JA, Matheu J, Bravo-Vallejo C, Fernández-Moreira E, Vinueza-Burgos C	2020	Ecuador	Animal		tissues	133	122		122		50						9							3						20												PCR, Sequencing		https://www.frontiersin.org/articles/10.3389/fvets.2020.547843/full
			Food		chicken carcass	335	258		258		109						11				1			1						82
			Human clinic	Outpatient	feces	302	146		146		35										2			6						57
Brisola MC, Crecencio RB, Bitner DS, Frigo A, Rampazzo L, Stefani LM, Faria GA	2019	Brazil	Animal		feces	103	68	25	10																						4								5	2	Disc diffusion	PCR		https://www-sciencedirect-com.bibliotecavirtual.udla.edu.ec/science/article/pii/S0048969718329334
			Environmental		natural water bodies, waste water, drinking water, soil	203	67	20
Freitas DY, Araújo S, Folador ARC, Ramos R, Azevedo J, Tacao M, Silva A, Henriquez I, Baraúna R	2019	Brazil	Environmental		natural water bodies	33	7	3	3	2				1																											Disc diffusion	PCR, Sequencing	ST471	https://www.frontiersin.org/articles/10.3389/fmicb.2019.00364/full
Borges CA, Tarlton NJ, Riley LW	2019	Brazil	Human clinic	Outpatient	urine	149	149	130	71					15			4		2		10				1	1					65						8		2		Disc diffusion	PCR	ST10, ST131, ST69, ST117	https://pubmed.ncbi.nlm.nih.gov/31411497/
			Animal		feces	111	111	110	43								2				5				1	13					29
Fuentes-Castillo D, Farfán-López M, Esposito F, Moura Q, Fernandes MR, Lopes R, Cardoso B, Muñoz ME, Cerdeira L, Najle I, Muñoz PM, Catão-Dias JL, González-Acuña D, Lincopan N	2019	Brazil	Animal		feces	7	3		3												3																					Sequencing	ST2705, ST345, ST32	https://pubmed.ncbi.nlm.nih.gov/31022545/
Larson A, Hartinger SM, Riveros M, Salmon-Mulanovich G, Hattendorf J, Verastegui H, Huaylinos ML, Mäusezahl D	2019	Peru	Environmental		drinking water	314	117	6	1									1																							Disc diffusion	PCR		https://www.ajtmh.org/view/journals/tpmd/100/6/article-p1363.xml
Batalha de Jesus AA, Freitas AAR, de Souza JC, Martins N, Botelho LAB, Girão VBC, Teixeira LM, Riley LW, Moreira BM	2019	Brazil	Animal		feces	199	112	14	35		1			11			14				6																		3		Disc difussion, MALDI-TOF	PCR	ST648	https://pubmed.ncbi.nlm.nih.gov/30234422/
Lentz SAM, Adam FC, Rivas PM, Souza SN, Cupertino VML, Boff RT, da Motta AS, Wink PL, Barth AL, Martins AF	2020	Brazil	Animal		feces	340	343	57	39	6							23				1			3							6										Disc diffusion	PCR		https://pubmed.ncbi.nlm.nih.gov/31718408/
Melo LC, Oresco C, Leigue L, Netto HM, Melville PA, Benites NR, Saras E, Haenni M, Lincopan N, Madec JY	2018	Brazil	Animal		feces, urine	300	68	22	22					4			4				4	2																	20		Disc diffusion, MALDI-TOF	PCR, Sequencing	ST90, ST457, ST973, ST2541	https://www-sciencedirect-com.bibliotecavirtual.udla.edu.ec/science/article/pii/S037811351830141X
Zurita J, Yánez F, Sevillano G, Ortega-Paredes D, Paz Y Miño A	2020	Ecuador	Food		street food	150	20	20	20			2	1	6	10	1																									MALDI-TOF, VITEK	PCR	ST131, ST410, ST744	https://pubmed.ncbi.nlm.nih.gov/31837237/
Miranda J, Pinto J, Faustino M, Sánchez-Jacinto B, Ramirez F	2019	Peru	Human Clinic	Inpatient	urine	176	99		428	279																															VITEK			https://rpmesp.ins.gob.pe/index.php/rpmesp/article/view/3765/3247
				Outpatient		1213	927
Ortega-Paredes D, Barba P, Mena-López S, Espinel N, Zurita J	2018	Ecuador	Food		vegetables	27	24	24	24					24																											Disc difussion, VITEK	PCR	ST410 ST44	https://pubmed.ncbi.nlm.nih.gov/29777948/
Pavez M, Troncoso C, Osses I, Salazar R, Illesca V, Reydet P, Rodríguez C, Chahin C, Concha C, Barrientos L	2019	Chile	Human clinic	Inpatient	blood, respiratory sample, secretion, catheter	137	18	18	18		15						2							6						12											Disc diffusion	PCR		https://www.sciencedirect.com/science/article/pii/S1413867018306639?via%3Dihub
Umpiérrez A, Bado I, Oliver M, Acquistapace S, Etcheverría A, Padola NL, Vignoli R, Zunino P	2017	Uruguay	Animal		feces	303	303	3	3			3																													Disc diffusion	PCR	ST5846, ST5849, ST5841 ST5842	https://www.ncbi.nlm.nih.gov/pmc/articles/PMC5606698/
Coppola N, Freire B, Umpiérrez A, Cordeiro NF, Ávila P, Trenchi G, Castro G, Casaux ML, Fraga M, Zunino P, Bado I, Vignoli R	2020	Uruguay	Animal		feces	282	282	230	230			4		2	1		7				22					2		7											19		Disc diffusion, MALDI-TOF	PCR		https://www.frontiersin.org/articles/10.3389/fvets.2020.588919/full
Cyoia PS, Koga VL, Nishio EK, Houle S, Dozois CM, de Brito KCT, de Brito BG, Nakazato G, Kobayashi RKT	2018	Brazil	Food		chicken meat	98	409	119	117		6						61				30			9						11											Disc diffusion	PCR		https://www.frontiersin.org/articles/10.3389/fmicb.2018.03254/full
Nogueira K, Conte D, Maia F, Dalla-Costa L	2015	Brazil	Human clinic	Inpatient	Urine, blood, secretion, respiratory sample, wound	732	732	41	41			1		1			26				5							8													Disc diffusion	PCR		https://www.scielo.br/scielo.php?script=sci_arttext&pid=S0037-86822015000200162&lng=en&tlng=en
Bartley PS, Domitrovic TN, Moretto VT, Santos CS, Ponce-Terashima R, Reis MG, Barbosa LM, Blanton RE, Bonomo RA, Perez F	2019	Brazil	Environmental		waste water	23	23	12	15	11																				4											VITEK	PCR	ST131, ST506, ST476, ST539, ST340	https://www.ncbi.nlm.nih.gov/pmc/articles/PMC6553890/
Araque M, Labrador I	2018	Venezuela	Human clinic	Outpatient	feces	78	78	27	27					27													2	1			3	2									Disc diffusion, VITEK	PCR		https://ophrp.org/journal/view.php?doi=10.24171/j.phrp.2018.9.1.03
Pereira JL, Volcão LM, Klafke GB, Vieira RS, Gonçalves CV, Ramis IB, da Silva PEA, von Groll A	2019	Brazil	Human clinic	Inpatient	urine	79	55	28	25		14						2				7	1				1															MIC	PCR, Sequencing		https://pubmed.ncbi.nlm.nih.gov/30133334/
				Outpatient		356	307
Palma N, Pons MJ, Gomes C, Mateu J, Riveros M, García W, Jacobs J, García C, Ochoa TJ; Ruiz J	2017	Peru	Human clinic	Inpatient	blood	62	62	27	27					13		6	4											2			27						9				Disc diffusion	PCR, Sequencing		https://pubmed.ncbi.nlm.nih.gov/28743651/
Botelho LA, Kraychete GB, Rocha PB, da-Silva APS, Picão RC, Moreira BM, Bonelli RR	2020	Brazil	Food		chicken meat	46	46		46					1			15				8																		2			PCR, Sequencing	ST115, ST155, ST602, ST1125, ST3258	https://www.liebertpub.com/doi/10.1089/mdr.2019.0043
Faccone D, Rapoport M, Albornoz E, Celaya F, De Mendieta J, De Belder D, Lucero C, Gomez S, Danze D, Pasteran F, Corso A	2020	Argentina	Human clinic	Inpatient	urine, blood	192	192	77	77		4						37				11	21																			Disc diffusion	PCR		https://www.ncbi.nlm.nih.gov/pmc/articles/PMC7498280/
Beirão EM, Rodrigues SDS, Andrade TK, Serra FB, Paula MDN, Polis TJB, Gales AC	2020	Brazil	Human clinic	Inpatient	urine, intraabdominal sample, respiratory sample	1748	494	52	37			3		13			8				11	2																			MicroScan	PCR		https://www.sciencedirect.com/science/article/pii/S1413867020300891?via%3Dihub
Dias-Gonçalves, et al.	2019	Brazil	Environmental		natural water bodies	7	6	3	3		2																			2								1			Disc diffusion	PCR		https://revistabiomedica.org/index.php/biomedica/article/view/4391/4323
			Human clinic	Inpatient	urine, respiratory sample, secretion, blood, intraabdominal sample, catheter	7	2	2	2		1																			2								1
Villar, Aubert, Baserni, Jugo	2013	Argentina	Human clinic	Outpatient	vaginal swab, feces	259	37	14																																	Disc diffusion, E-test, Chromogenic medium			https://www.tandfonline.com/doi/full/10.1179/1973947813Y.0000000081
Colquechagua, Sevilla, Gonzales	2015	Peru	Human clinic	Outpatient	feces	235	130	130	119	119																															Disc diffusion	PCR		https://rpmesp.ins.gob.pe/index.php/rpmesp/article/view/1571
Chiluisa, Escobar, Dutra	2018	Ecuador	Human clinic	Outpatient	urine	35	35	35	4					4										4						1											Disc diffusion	PCR, Sequencing	ST131	https://www.mdpi.com/2076-0817/7/2/42
Palma, et al.	2016	Peru	Human clinic	Inpatient	blood	78	65	26																																	Disc diffusion			https://www.sciencedirect.com/science/article/abs/pii/S0732889316301419?via%3Dihub
Sarmiento, et al.	2018	Peru	Human clinic	Inpatient	blood	85	43	24																																	Disc diffusion			https://rpmesp.ins.gob.pe/index.php/rpmesp/article/view/3601
Blanco, et al.	2016	Colombia	Human clinic	Inpatient	urine	2124	431	54	29					29										2						7											MIC	qPCR, Sequencing	ST131	https://www.sciencedirect.com/science/article/abs/pii/S0213005X15004553?via%3Dihub
Chagas, et al.	2011	Brazil	Environmental		waste water	221	35	7	___																																Disc diffusion	PCR		https://sfamjournals.onlinelibrary.wiley.com/doi/full/10.1111/j.1365-2672.2011.05072.x
Vignoli, et al.	2016	Uruguay	Human clinic	Inpatient	urine, blood, wound, respiratory sample, intraabdominal sample	55	55	55	55			8		37			11				1	1																			Disc diffusion	PCR, Sequencing	ST131, ST405	https://jidc.org/index.php/journal/article/view/26829536
				Outpatient
Campos, et al.	2020	Brazil	Human clinic	Inpatient	urine	107	107	31	30		1	3		17			4				5																				E-test	Sequencing	ST131, ST405, ST648, ST10	https://pubmed.ncbi.nlm.nih.gov/33193282/
Woerther, et al.	2013	French Guiana	Human community		feces	151	8	___	8		6						2				5																				Disc diffusion, Chromogenic medium	PCR, Sequencing	ST10	https://aac.asm.org/content/57/10/5060.long
Gonçalves, et al.	2016	Brazil	Human clinic	Outpatient	urine	324	324	23	16					9			3				1	3																			VITEK	PCR	ST131, ST10, ST38, ST648	https://www.sciencedirect.com/science/article/abs/pii/S2213716516300212?via%3Dihub
Martínez, Garzón, Mattar	2012	Colombia	Human clinic	Outpatient	urine	123	102	11	12		7																			7											Disc diffusion	PCR		https://www.sciencedirect.com/science/article/pii/S1413867012001171?via%3Dihub
Peirano, et al.	2011	Brazil	Human clinic	Inpatient	blood, orina, feces, intraabdominal sample, wound	25	25	25	23					16			2	2			3			2						13											Disc diffusion	PCR	ST131, ST410	https://www.clinicalmicrobiologyandinfection.com/article/S1198-743X(14)61385-9/fulltext
				Outpatient
Andrade, et al.	2010	Brazil	Human clinic	Inpatient	cerebroespinal fluid	3498	11	___	3								3																								Disc diffusion	PCR, Sequencing		https://cdnsciencepub.com/doi/10.1139/w10-020?url_ver=Z39.88-2003&rfr_id=ori:rid:crossref.org&rfr_dat=cr_pub%20%200pubmed
Abreu, et al.	2011	Brazil	Human clinic	Inpatient	urine, respiratory sample, blood, wound, secretion	659	20	20	20	17																				14											Disc diffusion	PCR		https://www.scielo.br/scielo.php?script=sci_arttext&pid=S0037-86822011000400008&lng=en&nrm=iso&tlng=en
				Outpatient
Villar, Baserni, Jugo	2013	Argentina	Human clinic	Outpatient	feces	164	33	28																																	Disc diffusion, Chromogenic medium			https://jidc.org/index.php/journal/article/view/23949299
Garrido, et al.	2017	Ecuador	Human clinic	Inpatient	urine	132	59	10																																	Disc diffusion, E-test			https://www.sciencedirect.com/science/article/pii/S1665114616301381?via%3Dihub
				Outpatient
Koga, et al.	2015	Brazil	Food		chicken carcass	205	205	___	39		2						25				14																				Disc diffusion	PCR		https://www.liebertpub.com/doi/10.1089/fpd.2014.1888?url_ver=Z39.88-2003&rfr_id=ori:rid:crossref.org&rfr_dat=cr_pub%20%200pubmed
Wollheim, et al.	2011	Brazil	Human clinic	Inpatient	urine, respiratory sample, blood, intraabdominal sample, skin	1346	1162	18	17	9														2						12											Disc diffusion	PCR		https://www.sciencedirect.com/science/article/pii/S1413867011701593?via%3Dihub
Borges, et al.	2017	Brazil	Animal		respiratory sample, feces, tissues	111	24	___	1												1																					PCR, Sequencing		https://www.sciencedirect.com/science/article/abs/pii/S1090023316302258?via%3Dihub
Soria, Soria, Cartelle	2018	Ecuador	Human clinic	Outpatient	urine	8768	884	89	74					57																											Disc diffusion	PCR, Sequencing		https://www.liebertpub.com/doi/10.1089/mdr.2017.0325
Viana, et al.	2013	Brazil	Human clinic	Inpatient	urine, wound, blood, catheter, respiratory sample	106	61	___	1															1																		PCR		https://www.microbiologyresearch.org/content/journal/jmm/10.1099/jmm.0.055970-0
Bado, et al.	2016	Uruguay	Human clinic	Inpatient	cerebroespinal fluid, respiratory sample, urine, wound	68	14	___	14			6		9			2																								VITEK	PCR, Sequencing	ST10, ST405	https://www.sciencedirect.com/science/article/abs/pii/S2213716516300182?via%3Dihub
Hernandez, et al.	2013	Chile	Animal		feces	372	267	129	112		122						2					4		2						2											Disc diffusion, Chromogenic medium	qPCR, Sequencing	ST131, ST10, ST48, ST38, ST405	https://journals.plos.org/plosone/article?id=10.1371/journal.pone.0076150
			Human clinic	Outpatient	feces	49	45	____	5		2			2						1
Botelho, et al.	2015	Brazil	Food		chicken carcass	689	216	____	45					3			32				10																				Disc diffusion	PCR, Sequencing		https://www.scielo.br/scielo.php?script=sci_arttext&pid=S0074-02762015000200249&lng=en&tlng=en
Dropa, et al.	2016	Brazil	Environmental		waste water, sludge	20	4	4	4					1							3																				Disc diffusion	PCR, Sequencing		https://link.springer.com/article/10.1007%2Fs11356-016-6079-5
García, et al.	2011	Uruguay	Human clinic	Inpatient	urine, blood, feces, wound, catheter, sinovial fluid	44326	5	___	5					1			3										1														Disc diffusion	PCR, Sequencing		https://academic.oup.com/jac/article/66/8/1725/678065
Pallecchi, et al.	2004	Bolivia, Peru	Human community		feces	3208	4	4	4					1			3													4											Disc diffusion	PCR, Sequencing, Southern Blot, Colony Hibridation Blot		https://aac.asm.org/content/48/12/4556
Quijada, et al.	2017	Venezuela	Human clinic	Inpatient	urine	73	8	6																																	Disc diffusion			https://rpmesp.ins.gob.pe/index.php/rpmesp/article/view/2766
Minarini, et al.	2007	Brazil	Human clinic	Outpatient	urine	1481	1126	7	6								3							3						6											Disc diffusion, E-test	PCR		https://link.springer.com/article/10.1007%2Fs00284-006-0307-z
Gazal, et al.	2021	Brazil	Animal		feces, feces bettles (Alphitobius sp.)	1380	52	41	48		18						23				10																				Disc diffusion	PCR, Sequencing		https://www.frontiersin.org/articles/10.3389/fmicb.2020.604544/full
			Environmental		poultry litter, drinking water	72	54	33	35		9						23				8
			Food		bird food	24	11	4	5		3						2				2
Sartori, et al.	2017	Brazil	Animal		feces	95	68	68	50					50																												Sequencing	ST90	https://www.sciencedirect.com/science/article/abs/pii/S2213716517301960?via%3Dihub
Marusinec, et al.	2021	Ecuador	Human community		feces	740	516	95																																	Disc diffusion			https://aricjournal.biomedcentral.com/articles/10.1186/s13756-020-00867-7
Jones, et al.	2013	Argentina, Brazil, Chile, Colombia, Ecuador, Peru, Venezuela	Human clinic	Inpatient	blood, respiratory sample, wound	3337	174	174	___																																MIC	PCR, Sequencing		https://www.sciencedirect.com/science/article/pii/S1413867013002298?via%3Dihub
				Outpatient
Adrianzén, et al.	2013	Peru	Human clinic	Inpatient	blood	85	62	16																																	Disc diffusion			https://www.scielosp.org/article/rpmesp/2013.v30n1/18-25/es/
Tedesco, Guevara	2012	Venezuela	Human clinic	Inpatient	Secretion, urine, blood	1991	146	23																																	Disc diffusion			https://pubmed.ncbi.nlm.nih.gov/22767307/
di Conza, et al.	2014	Argentina	Human clinic	Outpatient	blood, urine, wound	843	38	___	11																					10				1								PCR, Sequencing		https://www.sciencedirect.com/science/article/pii/S0325754114700756?via%3Dihub
da Silva, et al.	2017	Brazil	Animal		respiratory sample	300	227	___	4								4																								MIC	PCR		https://www.sciencedirect.com/science/article/abs/pii/S073288931630325X?via%3Dihub
Fernandes, et al.	2018	Brazil	Animal		feces	20	2	2	2					1			1																								MALDI-TOF	PCR, Sequencing	ST648	https://www.sciencedirect.com/science/article/abs/pii/S1567134818302387?via%3Dihub
da Silva, et al.	2008	Brazil	Human clinic	Inpatient	urine, blood, respiratory sample, wound, secretion, tissues, catheter	112	42	10																																	Disc diffusion			https://www.sciencedirect.com/science/article/abs/pii/S0732889307003392?via%3Dihub
Ferreira, et al.	2014	Brazil	Animal		feces	200	19	19	19								19																								Disc diffusion	PCR, Sequencing, Southern Blot		https://www.clinicalmicrobiologyandinfection.com/article/S1198-743X(14)65396-9/fulltext
Quiles MG, Menezes LC, Bauab K, Gumpl EK, Rocchetti TT, Palomo, FS, Carlesse F, Pignatari AC	2015	Brazil	Human clinic	Inpatient	blood	137	8		1		1			-			-							-						-												qPCR		https://pubmed.ncbi.nlm.nih.gov/26201513/
Dias R, Vieira MA, Moro AC, Ribolli D, Monteiro A, Camargo CH, Tiba-Casas MR, Soares FB, Dos Santos LF, Montelli AC, da Cunha M, Barretti P, Hernandes RT	2019	Brazil	Human clinic	Inpatient	blood	542	27	-	10		10			-			-							-						-											Disc diffusion	PCR, Sequencing		https://pubmed.ncbi.nlm.nih.gov/31347999/
Ferreira CM, Ferreira WA, Almeida NC, Naveca FG, Barbosa M	2011	Brazil	Human clinic	Inpatient	urine, blood, secretion, tissues, respiratory sample, feces, wound	146	8	8	6				6																												E-test	PCR		https://pubmed.ncbi.nlm.nih.gov/24031725/
Rugini CL, Sobottka AM, Fuentefria DB	2015	Brazil	Human clinic	Inpatient	urine, blood, respiratory sample, feces, wound	19112	666	666	-																																Disc diffusion			http://www.scielo.br/scielo.php?script=sci_arttext&pid=S0037-86822015000600692&lng=en&tlng=en
Oplustil CP, Nunes R, Mendes C, RESISTNET Group	2001	Brazil	Human clinic	Inpatient/Outpatient	urine, blood	894	894	72	-																																Disc diffusion			http://www.scielo.br/scielo.php?script=sci_arttext&pid=S1413-86702001000100002&lng=en&nrm=iso&tlng=en
Tosin I, Silbert S, Sader HS	2003	Brazil	Human clinic	Inpatient	blood	119	26	26																																	Disc diffusion			http://www.scielo.br/scielo.php?script=sci_arttext&pid=S1413-86702003000600002&lng=en&nrm=iso&tlng=en
Murray M, Salvatierra G, Dávila-Barclay A, Ayzanoa B, Castillo-Vilcahuaman C, Huang M, Pajuelo MJ, Lescano AG, Cabrera L, Calderón M, Berg DE, Gilman RH, Tsukayama P	2021	Peru	Human community		feces	131	150	6																																	Disc diffusion			https://www.ncbi.nlm.nih.gov/pmc/articles/PMC7961087/
			Animal		feces	61	165	51
Guevara N, Guzmán M, Merentes A, Rizzi A, Papaptzikos J, Rivero N, Oranges C, Vlllarroel H, Limas Y	2015	Venezuela	Human clinic	Inpatient	urine	472	363	79																																	MIC			https://scielo.conicyt.cl/scielo.php?script=sci_arttext&pid=S0716-10182015000700005&lng=en&nrm=iso&tlng=en
Casellas JM, Tomé G, Bantar C, Bertolini P, Blázquez N, Borda N, Couto E, Cudmani N, Guerrera J, Juárez MJ, López T, Littvik A, Méndez E, Notario R, Ponce G, Quinteros M, Salamone F, Sparo M, Sutich E, Vaylet S, Wolff L	2003	Argentina	Human clinic	Inpatient	intraabdominal sample, wound, blood, urine	1200	145	37																																	Disc diffusion, MIC			https://www.sciencedirect.com/science/article/abs/pii/S0732889303001317?via%3Dihub
Motta RN, Oliveira MM, Magalhães PS, Dias AM, Aragão LP, Forti AC, Carvalho CB	2003	Brazil	Human clinic	Outpatient	wound	141	24	3																																	Disc diffusion			http://www.scielo.br/scielo.php?script=sci_arttext&pid=S1413-86702003000200006&lng=en&nrm=iso&tlng=en
Rossi F, García P, Ronzon B, Curcio D, Dowzicky MJ	2008	Argentina, Brazil, Chile, Colombia, Venezuela	Human clinic	Inpatient/Outpatient	blood, urine, respiratory sample	6600	825	559																																	Disc diffusion			https://pubmed.ncbi.nlm.nih.gov/19219281/
Casella T, Rodríguez MM, Takahashi JT, Ghiglione B, Dropa M, Assunção E, Nogueira ML, Lincopan N, Gutkind G, Nogueira MC	2015	Brazil	Food		chicken meat	15	3	3	3								2				1																					PCR		https://www.sciencedirect.com/science/article/pii/S0168160514005959?via%3Dihub#t0005
de Oliveira CF, Salla A, Lara VM, Rieger A, Horta JA, Alves SH	2010	Brazil	Human clinic	Inpatient	blood, urine, secretion	90	22	10	1															10																	Disc diffusion	PCR		https://www.ncbi.nlm.nih.gov/pmc/articles/PMC3768689/
Seki LM, Pereira PS, de Souza Conceição M, Souza MJ, Marques EA, Carballido JM, de Carvalho ME, Assef AP, Asensi MD	2013	Brazil	Human clinic	Inpatient	blood	231	74	11	2		5			6																											Disc diffusion	PCR		https://www.sciencedirect.com/science/article/pii/S1413867013001992?via%3Dihub
Salgado-Caxito M, Benavides JA, Munita JM, Rivas L, García P, Listoni F, Moreno-Switt AI, Paes AC	2021	Brazil	Animal		feces	130	18	12	1	12																															Disc diffusion	PCR		https://pubmed.ncbi.nlm.nih.gov/33725561/
Vignoli R, Varela G, Mota MI, Cordeiro NF, Power P, Ingold E, Gadea P, Sirok A, Schelotto F, Ayala JA, Gutkind G	2005	Uruguay	Human clinic	Inpatient	feces	13	13		11																								11			11					Disc diffusion	Sequencing		https://www.ncbi.nlm.nih.gov/pmc/articles/PMC1151943/
Hernández E, Araque M, Millán Y, Millán B, Vielma S	2014	Venezuela	Human clinic	Outpatient	urine	21	21	21	2		1			20																											Disc diffusion, MIC	PCR		http://ve.scielo.org/scielo.php?script=sci_arttext&pid=S0535-51332014000100005
Saba Villarroel PM, Gutkind GO, Di Conza JA, Radice MA	2017	Bolivia	Human clinic	Inpatient	blood, urine, respiratory sample	101	87	78	2		67											9																			Disc diffusion, MIC	PCR, Sequencing		https://pubmed.ncbi.nlm.nih.gov/27988173/
Lago A, Fuentefria SR, Fuentefria DB	2010	Brazil	Human clinic	Inpatient	blood, urine, respiratory sample	4888	96	96																																	Disc diffusion			https://www.scielo.br/j/rsbmt/a/JkWvkv6B7gjX7JJpPKVkHzr/?lang=pt
Marchetti L, Buldain D, Gortari Castillo L, Buchamer A, Chirino-Trejo M, Mestorino N	2021	Argentina	Animal		feces	100	95	12	-	-	-																														Difusión de disco			https://www.ncbi.nlm.nih.gov/pmc/articles/PMC7850822/
Wozniak A, Villagra NA, Undabarrena A, Gallardo N, Keller N, Moraga M, Román JC, Mora GC, García P	2012	Chile	Human clinic	Inpatient	urine, blood, intraabdominal sample	61	8	7	1	7																															Disc diffusion, E-test	PCR, Sequencing		https://pubmed.ncbi.nlm.nih.gov/22700549/
Queiroz ML, Antunes P, Mourão J, Merquior VL, Machado E, Peixe LV	2012	Brazil	Human clinic	4/7 samples Inpatient	urine, blood, feces, respiratory sample	41	41	7	3
				3/7 no specific													4		1			2																			Disc diffusion	PCR, Sequencing		https://www.sciencedirect.com/science/article/abs/pii/S0732889312002040?via%3Dihub
Salinas L, Loayza F, Cárdenas P, Saraiva C, Johnson TJ, Amato H, Graham JP, Trueba G	2021	Ecuador	Human community		feces	264	264	264	18						69																										Disc diffusion	Sequencing		https://ehp.niehs.nih.gov/doi/full/10.1289/EHP7729
Bartoloni A, Sennati S, Di Maggio T, Mantella A, Riccobono E, Strohmeyer M, Revollo C, Villagran AL, Pallecchi L, Rossolini GM	2016	Bolivia	Human clinic	Outpatient	urine	213	170	56	2				20	36																											Disc diffusion	PCR		https://pubmed.ncbi.nlm.nih.gov/26686940/
Vasques MR, Bello AR, Lamas C, Correa J, Pereira JA	2011	Brazil	Human clinic	Inpatient	feces	41	9	9	9	9																															Disc diffusion	PCR		https://pubmed.ncbi.nlm.nih.gov/21412586/
Mendo-Lopez R, Jasso L, Guevara X, Astocondor AL, Alejos S, Bardossy AC, Prentiss T, Zervos MJ, Jacobs J, García C	2017	Peru	Human clinic	Outpatient	blood	97	22	11	-	-																															Disc diffusion			https://pubmed.ncbi.nlm.nih.gov/28722595/
Gaitán C, Espinal M	2009	Colombia	Human clinic	Inpatient	blood, urine, respiratory sample, secretion	144	93	12	4		7													10						11										7	Disc diffusion	PCR		https://www.scielo.cl/scielo.php?script=sci_arttext&pid=S0716-10182009000400006&lng=en&nrm=iso&tlng=en
Sennati S, Santella G, Di Conza J, Pallecchi L, Pino M, Ghiglione B, Rossolini GM, Radice M, Gutkind G	2012	Argentina	Human clinic	Inpatient	feces	277	64	13	3			3		7			3																								Disc diffusion	PCR	ST131	https://pubmed.ncbi.nlm.nih.gov/22908156/
Ferreira JC, Penha-Filho RA, Andrade LN, Berchieri Junior A, Darini AL	2016	Brazil	Animal		feces	100	13	13	3					1			3				9																				Disc diffusion	PCR		https://www.sciencedirect.com/science/article/abs/pii/S0732889316301353?via%3Dihub
Abreu AG, Marques SG, Monteiro-Neto V, Gonçalves AG	2013	Brazil	Human clinic	Inpatient	urine	916	20	20	2	16																				6											Disc diffusion	PCR		https://europepmc.org/article/MED/24294239
Hawser SP, Bouchillon SK, Hoban DJ, Badal RE, Hackel MA, Lascols CA, Villegas MV, Rossi F	2012	Argentina, Brazil, Chile, Colombia, Ecuador, Venezuela	Human clinic	Inpatient	feces	1366	1366	323	323	323																															MIC	PCR		https://pubmed.ncbi.nlm.nih.gov/22546718/
Quinteros M, Radice M, Gardella N, Rodriguez MM, Costa N, Korbenfeld D, Couto E, Gutkind G, Microbiology Study Group	2003	Argentina	Human clinic	Inpatient	urine	427	186	5	5	4																									1						Disc diffusion	PCR, Sequencing		https://pubmed.ncbi.nlm.nih.gov/12936986/
Flamm RK, Sader HS, Jones RN	2014	Argentina, Brazil, Chile, Colombia, Venezuela	Human clinic	Inpatient	respiratory sample, skin, blood, secretion, urine	2484	518	195																																	MIC			https://pubmed.ncbi.nlm.nih.gov/24513484/
Nordberg V, Quizhpe-Peralta A, Galindo T, Turlej-Rogacka A, Iversen A, Giske CG, Navér L	2013	Ecuador	Human clinic	Inpatient	feces	123	36	36	36		36
				Outpatient																																					Disc diffusion	PCR		https://pubmed.ncbi.nlm.nih.gov/24146896/
Fernandes MR, Sellera FP, Esposito F, Sabino CP, Cerdeira L, Lincopan N	2017	Brazil	Environmental		waste water	11	3	3	3	3	3																														MIC	PCR		https://pubmed.ncbi.nlm.nih.gov/28416556/
Redondo C, Chalbaud A, Alonso G	2013	Venezuela	Human clinic	Inpatient	urine, respiratory sample, skin, secretion, blood, intraabdominal sample	97	53	24	24		22						2																								MIC	PCR		https://pubmed.ncbi.nlm.nih.gov/23067200/
Villar HE, Jugo MB, Macan A, Visser M, Hidalgo M, Maccallini GC	2014	Argentina	Human clinic	Outpatient	urine	791	374	57																																	Disc diffusion			https://pubmed.ncbi.nlm.nih.gov/24916867/
Moreno A, Bello H, Guggiana D, Domínguez M, González G	2008	Chile	Animal		feces	70	70	14	14		2											4														8					Disc diffusion	PCR, Sequencing		https://pubmed.ncbi.nlm.nih.gov/18166282/
Pallecchi L, Bartoloni A, Fiorelli C, Mantella A, Di Maggio T, Gamboa H, Gotuzzo E, Kronvall G, Paradisi F, Rossolini GM	2007	Bolivia, Peru	Human community		feces	54	54	50	44		14						18					12																			Disc diffusion	PCR		https://pubmed.ncbi.nlm.nih.gov/17548490/
Báez J, Hernández-García M, Guamparito C, Díaz S, Olave A, Guerrero K, Cantón R, Baquero F, Gahona J, Valenzuela N, Del Campo R, Silva J	2015	Chile	Animal		feces	124	91	67	62					38			12	1					11																		Disc diffusion	PCR	ST131	https://pubmed.ncbi.nlm.nih.gov/25313843/
Conte D, Palmeiro JK, da Silva Nogueira K, de Lima TM, Cardoso MA, Pontarolo R, Dalla-Costa LM	2017	Brazil	Environmental		natural water bodies, waste water	152	32	32	29	26														3																	Disc diffusion	PCR, Sequencing		https://www.sciencedirect.com/science/article/pii/S0147651316304377
Nascimento T, Cantamessa R, Melo L, Fernandes MR, Fraga E, Dropa M, Lincopan N	2017	Brazil	Environmental		natural water bodies	23	6	2	2					1																									1		Disc diffusion	PCR, Sequencing		https://www.sciencedirect.com/science/article/pii/S0048969717307283
Flores-Moya RA, Albornoz-Cardozo CS, Hurtado-Cáceres J, Montyear-Villagomez VM, Santa Cruz A	2019	Bolivia	Environmental		natural water bodies	70	23	23																																	Disc diffusion			http://www.scielo.org.bo/scielo.php?pid=S1817-74332019000200003&script=sci_arttext
Guzmán J, Gonzales L, Poma V, Bengtsson J, Thorell K, Flach C, Iñiguez V, Sjöling Å	2019	Bolivia	Environmental		natural water bodies	101	5	3	3									1													1						1					PCR, Sequencing		https://journals.plos.org/plosone/article?id=10.1371/journal.pone.0210735
Ortega-Paredes D, Barba P, Mena-López S, Espinel N, Crespo V, Zurita J	2020	Ecuador	Environmental		natural water bodies	45	45	16	16		4		3		8			1																							Disc diffusion	PCR, Sequencing	ST167	https://iwaponline.com/jwh/article/18/1/67/71711/High-quantities-of-multidrug-resistant-Escherichia
Pehrsson EC, Tsukayama P, Patel S, Mejía-Bautista M, Sosa-Soto G, Navarrete KM, Dantas G	2016	Peru	Environmental		waste water	45	45	20	10				2				8																								Disc diffusion	PCR, Sequencing		https://www.nature.com/articles/nature17672
			Human community		feces	51	51	17	17				7				10

## Sheet: Supp_table 5
Supplementary Table 5. List of additional references included in the systematic review
Number of cite assigned*	Reference	*Number corresponds to order citation related to Reference Section of Main Text
107	Daga AP, Koga VL, Soncini JGM, et al. Escherichia coli Bloodstream Infections in Patients at a University Hospital: Virulence Factors and Clinical Characteristics. Front. Cell Infect Microbiol. 2019;9:191.
108	Palmeira JD, Haenni M, Metayer V, Madec JY, Ferreira HMN. Epidemic spread of IncI1/pST113 plasmid carrying the Extended-Spectrum Beta-Lactamase (ESBL) blaCTX-M-8 gene in Escherichia coli of Brazilian cattle. Vet Microbiol. 2020;243:108629.
109	Ortega-Paredes D, Haro M, Leoro-Garzón P, et al. Multidrug-resistant Escherichia coli isolated from canine faeces in a public park in Quito, Ecuador. J Glob Antimicrob Resist. 2019;18:263-268.
110	Faccone D, Moredo FA, Giacoboni GI, et al. Multidrug-resistant Escherichia coli harbouring mcr-1 and blaCTX-M genes isolated from swine in Argentina. J Glob Antimicrob Resist. 2019,18,160-162.
111	Vinueza-Burgos C, Ortega-Paredes D, Narváez C, De Zutter L, Zurita J. Characterization of cefotaxime resistant Escherichia coli isolated from broiler farms in Ecuador. PLoS ONE. 2019;14(4):e0207567.
112	Cunha MPV, Oliveira MCV, Oliveira MGX, Menão MC, Knöbl T. CTX-M-producing Escherichia coli Isolated from urban pigeons (Columba livia domestica) in Brazil. J Infect Dev Ctries. 2019;13:1052-1056.
113	Aristizábal-Hoyos AM, Rodríguez EA, Arias L, Jiménez JN. High clonal diversity of multidrug-resistant and extended spectrum beta-lactamase-producing Escherichia coli in a wastewater treatment plant. J Environ Manage. 2019;245:37-47.
114	Rumi MV, Mas J, Elena A, et al. Co-occurrence of clinically relevant β-lactamases and MCR-1 encoding genes in Escherichia coli from companion animals in Argentina. Vet Microbiol. 2019;230:228-234.
115	Hoepers PG, Silva PL, Rossi DA, et al. The association between extended spectrum beta-lactamase (ESBL) and ampicillin C (AmpC) beta-lactamase genes with multidrug resistance in Escherichia coli isolates recovered from turkeys in Brazil. Br Poult Sci. 2018;59(4):396-401.
116	Chavez MV, Caicedo LD, Castillo JE. Occurrence of β-Lactamase-Producing Gram-Negative Bacterial Isolates in Water Sources in Cali City, Colombia. Int J Microbiol. 2019;2019:1375060.
117	de Carvalho MPN, Fernandes MR, Sellera FP, et al. International clones of extended-spectrum β-lactamase (CTX-M)-producing Escherichia coli in peri-urban wild animals, Brazil. Transbound Emerg Dis. 2020;67(5):1804-1815.
118	Benavides JA, Shiva C, Virhuez M, et al. Extended-spectrum beta-lactamase-producing Escherichia coli in common vampire bats Desmodus rotundus and livestock in Peru. Zoonoses Public Health. 2018;65(4):454-458.
119	Guzmán M, Salazar E, Cordero V, et al. Multirresistencia a medicamentos y factores de riesgo asociados con infecciones urinarias por Escherichia coli adquiridas en la comunidad, Venezuela [Multidrug resistance and risk factors associated with community-acquired urinary tract infections caused by Escherichia coli in Venezuela]. Biomedica. 2019;39(Suppl 1):S96-S107. Spanish.
120	Zurita J, Solís MB, Ortega-Paredes D, Barba P, Paz Y Miño A, Sevillano G. High prevalence of B2-ST131 clonal group among extended-spectrum β-lactamase-producing Escherichia coli isolated from bloodstream infections in Quito, Ecuador. J Glob Antimicrob Resist. 2019;19:216-221.
121	Sfaciotte RAP, Parussolo L, Melo FD, et al. Identification and Characterization of Multidrug-Resistant Extended-Spectrum Beta-Lactamase-Producing Bacteria from Healthy and Diseased Dogs and Cats Admitted to a Veterinary Hospital in Brazil. Microb Drug Resist. 2021;27(6):855-864.
122	Crecencio RB, Brisola MC, Bitner D, et al. Antimicrobial susceptibility, biofilm formation and genetic profiles of Escherichia coli isolated from retail chicken meat. Infect Genet Evol. 2020;84:104355.
123	Fernandes MR, Sellera FP, Moura Q, Esposito F, Sabino CP, Lincopan N. Identification and genomic features of halotolerant extended-spectrum-β-lactamase (CTX-M)-producing Escherichia coli in urban-impacted coastal waters, Southeast Brazil. Mar Pollut Bull. 2020;150:110689.
124	Freitas DY, Araújo S, Folador ARC, et al. Extended Spectrum Beta-Lactamase-Producing Gram-Negative Bacteria Recovered From an Amazonian Lake Near the City of Belém, Brazil. Front Microbiol. 2019;10:364.
125	Fuentes-Castillo D, Farfán-López M, Esposito F, et al. Wild owls colonized by international clones of extended-spectrum β-lactamase (CTX-M)-producing Escherichia coli and Salmonella Infantis in the Southern Cone of America. Sci Total Environ. 2019;674:554-562.
126	Larson A, Hartinger SM, Riveros M, et al. Antibiotic-Resistant Escherichia coli in Drinking Water Samples from Rural Andean Households in Cajamarca, Peru. Am J Trop Med Hyg. 2019;100(6):1363-1368.
127	Batalha de Jesus AA, Freitas AAR, de Souza JC, et al. High-Level Multidrug-Resistant Escherichia coli Isolates from Wild Birds in a Large Urban Environment. Microb Drug Resist. 2019;25(2):167-172.
128	Lentz SAM, Adam FC, Rivas PM, et al. High Levels of Resistance to Cephalosporins Associated with the Presence of Extended-Spectrum and AmpC β-Lactamases in Escherichia coli from Broilers in Southern Brazil. Microb Drug Resist. 2020;26(5):531-535.
129	Zurita J, Yánez F, Sevillano G, Ortega-Paredes D, Paz Y Miño A. Ready-to-eat street food: a potential source for dissemination of multidrug-resistant Escherichia coli epidemic clones in Quito, Ecuador. Lett Appl Microbiol. 2020;70(3):203-209.
130	Miranda J, Pinto J, Faustino M, Sánchez-Jacinto B, Ramirez F. Resistencia antimicrobiana de uropatógenos en adultos mayores de una clínica privada de Lima, Perú [Antimicrobial resistance of uropathogens in older adults in a private clinic in Lima, Peru]. Rev Peru Med Exp Salud Publica. 2019;36(1):87-92. Spanish.
131	Ortega-Paredes D, Barba P, Mena-López S, Espinel N, Zurita J. Escherichia coli hyperepidemic clone ST410-A harboring blaCTX-M-15 isolated from fresh vegetables in a municipal market in Quito-Ecuador. Int J Food Microbiol. 2018;280:41-45.
132	Pavez M, Troncoso C, Osses I, et al. High prevalence of CTX-M-1 group in ESBL-producing Enterobacteriaceae infection in intensive care units in southern Chile. Braz J Infect Dis. 2019;23(2):102-110.
133	Umpiérrez A, Bado I, Oliver M, et al. Zoonotic Potential and Antibiotic Resistance of Escherichia coli in Neonatal Calves in Uruguay. Microbes Environ. 2017;32(3):275-282.
134	Coppola N, Freire B, Umpiérrez A, et al. Transferable Resistance to Highest Priority Critically Important Antibiotics for Human Health in Escherichia coli Strains Obtained From Livestock Feces in Uruguay. Front Vet Sci. 2020;7:588919
135	Cyoia PS, Koga VL, Nishio EK, et al. Distribution of ExPEC Virulence Factors, blaCTX-M, fosA3, and mcr-1 in Escherichia coli Isolated From Commercialized Chicken Carcasses. Front Microbiol. 2019;9:3254.
136	Nogueira S, Conte D, Maia FV, Dalla-Costa LM. Distribution of extended-spectrum β-lactamase types in a Brazilian tertiary hospital. Rev Soc Bras Med Trop. 2015;48(2):162-169.
137	Bartley PS, Domitrovic TN, Moretto VT, et al. Antibiotic Resistance in Enterobacteriaceae from Surface Waters in Urban Brazil Highlights the Risks of Poor Sanitation. Am J Trop Med Hyg. 2019;100(6):1369-1377.
138	Araque M, Labrador I. Prevalence of Fecal Carriage of CTX-M-15 Beta-Lactamase-Producing Escherichia coli in Healthy Children from a Rural Andean Village in Venezuela. Osong Public Health Res Perspect. 2018;9(1):9-15.
139	Pereira JL, Volcão LM, Klafke GB, et al. Antimicrobial Resistance and Molecular Characterization of Extended-Spectrum β-Lactamases of Escherichia coli and Klebsiella spp. Isolates from Urinary Tract Infections in Southern Brazil. Microb Drug Resist. 2019;25(2):173-181.
140	Palma N, Pons MJ, Gomes C, et al. Resistance to quinolones, cephalosporins and macrolides in Escherichia coli causing bacteraemia in Peruvian children. J Glob Antimicrob Resist. 2017;11:28-33.
141	Botelho LAB, Kraychete GB, Rocha PB, et al. CTX-M- and pAmpC-Encoding Genes Are Associated with Similar Mobile Genetic Elements in Escherichia coli Isolated from Different Brands of Brazilian Chicken Meat. Microb Drug Resist. 2020;26(1):14-20.
142	Faccone D, Rapoport M, Albornoz E, et al. Plasmidic resistance to colistin mediated by mcr-1 gene in Escherichia coli clinical isolates in Argentina: A retrospective study, 2012-2018. Rev Panam Salud Publica. 2020;44:e55.
143	Beirão EM, Rodrigues SDS, Andrade TK, et al. Activity of ceftolozane-tazobactam and comparators against gram-negative bacilli: Results from the study for monitoring antimicrobial resistance trends (SMART - Brazil; 2016-2017). Braz J Infect Dis. 2020;24(4):310-321.
144	Villar HE, Aubert V, Baserni MN, Jugo MB. Maternal carriage of extended-spectrum beta-lactamase-producing Escherichia coli isolates in Argentina. J Chemother. 2013;25(6):324-327.
145	Colquechagua-Aliaga F, Sevilla-Andrade C, Gonzales-Escalante E. Enterobacterias productoras de betalactamasas de espectro extendido en muestras fecales en el Instituto Nacional de Salud del Niño, Perú [Extended-spectrum beta-lactamase (esbl)-producing enterobacteriaceae in fecal samples at the National Institute of Child Health, Peru]. Rev Peru Med Exp Salud Publica. 2015;32(1):26-32. Spanish.
146	Chiluisa-Guacho C, Escobar-Perez J, Dutra-Asensi M. First Detection of the CTXM-15 Producing Escherichia coli O25-ST131 Pandemic Clone in Ecuador. Pathogens. 2018;7(2):42.
147	Palma N, Gomes C, Riveros M, et al. Virulence factors profiles and ESBL production in Escherichia coli causing bacteremia in Peruvian children. Diagn Microbiol Infect Dis. 2016;86(1):70-75.
148	Sarmiento AF, Mejia MN, Rozas AB, Giraldo CA, Málaga G. Frecuencia y factores de riesgo para bacteriemia por enterobacterias productoras de betalactamasa de espectro extendido en pacientes de un hospital público de Lima, Perú [Frequency and risk factors for bacteremia caused by extendedspectrum beta-lactamase-producing enterobacteriaceae in patients of a public hospital in Lima, Peru]. Rev Peru M…
149	Blanco VM, Maya JJ, Correa A, et al. Prevalencia y factores de riesgo para infecciones del tracto urinario de inicio en la comunidad causadas por Escherichia coli productor de betalactamasas de espectro extendido en Colombia [Prevalence and risk factors for extended-spectrum β-lactamase-producing Escherichia coli causing community-onset urinary tract infections in Colombia]. Enferm Infecc Microbi…
150	Chagas TP, Seki LM, Cury JC, et al. Multiresistance, beta-lactamase-encoding genes and bacterial diversity in hospital wastewater in Rio de Janeiro, Brazil. J Appl Microbiol. 2011;111(3):572-581.
151	Vignoli R, García-Fulgueiras V, Cordeiro NF, et al. Extended-spectrum β-lactamases, transferable quinolone resistance, and virulotyping in extra-intestinal E. coli in Uruguay. J Infect Dev Ctries. 2016;10(1):43-52.
152	Campos ACC, Andrade NL, Ferdous M, et al. Corrigendum: Comprehensive Molecular Characterization of Escherichia coli Isolates from Urine Samples of Hospitalized Patients in Rio de Janeiro, Brazil. Front Microbiol. 2020;11:599031.
153	Gonçalves LF, de Oliveira P, de Melo ABF, et al. Multidrug resistance dissemination by extended-spectrum β-lactamase-producing Escherichia coli causing community-acquired urinary tract infection in the Central-Western Region, Brazil. J Glob Antimicrob Resist. 2016;6:1-4.
154	Martinez P, Garzón D, Mattar S. CTX-M-producing Escherichia coli and Klebsiella pneumoniae isolated from community-acquired urinary tract infections in Valledupar, Colombia. Braz J Infect Dis. 2012;16(5):420-425.
155	Peirano G, Asensi MD, Pitondo-Silva A, Pitout JD. Molecular characteristics of extended-spectrum β-lactamase-producing Escherichia coli from Rio de Janeiro, Brazil. Clin Microbiol Infect. 2011;17(7):1039-1043.
156	Andrade LN, Minarini LA, Pitondo-Silva A, et al. Determinants of beta-lactam resistance in meningitis-causing Enterobacteriaceae in Brazil. Can J Microbiol. 2010;56(5):399-407.
157	Abreu AG, Marques SG, Monteiro-Neto V, Carvalho RM, Gonçalves AG. Infecção hospitalar e caracterização de enterobactérias produtoras de β-lactamases de espectro ampliado no nordeste do Brasil [Nosocomial infection and characterization of extended-spectrum β-lactamases-producing Enterobacteriaceae in Northeast Brazil]. Rev Soc Bras Med Trop. 2011;44(4):441-446. Portuguese.
158	Villar HE, Baserni MN, Jugo MB. Faecal carriage of ESBL-producing Enterobacteriaceae and carbapenem-resistant Gram-negative bacilli in community settings. J Infect Dev Ctries. 2013;7(8):630-634.
159	Garrido D, Garrido S, Gutiérrez M, et al. Clinical characterization and antimicrobial resistance of Escherichia coli in pediatric patients with urinary tract infection at a third level hospital of Quito, Ecuador. Bol Med Hosp Infant Mex. 2017;74(4):265-271.
160	Koga VL, Rodrigues GR, Scandorieiro S, et al. Evaluation of the Antibiotic Resistance and Virulence of Escherichia coli Strains Isolated from Chicken Carcasses in 2007 and 2013 from Paraná, Brazil. Foodborne Pathog Dis. 2015;12(6):479-485.
161	Wollheim C, Guerra IM, Conte VD, et al. Nosocomial and community infections due to class A extended-spectrum β-lactamase (ESBLA)-producing Escherichia coli and Klebsiella spp. in southern Brazil. Braz J Infect Dis. 2011;15(2):138-143.
162	Borges CA, Maluta RP, Beraldo LG, et al. Captive and free-living urban pigeons (Columba livia) from Brazil as carriers of multidrug-resistant pathogenic Escherichia coli. Vet J. 2017;219:65-67.
163	Soria-Segarra C, Soria-Baquero E, Cartelle-Gestal M. High Prevalence of CTX-M-1-Like Enzymes in Urinary Isolates of Escherichia coli in Guayaquil, Ecuador. Microb Drug Resist. 2018;24(4):393-402.
164	Viana ALM, Cayô R, Avelino CC, Gales AC, Franco MC, Minarini LAR. Extended-spectrum β-lactamases in Enterobacteriaceae isolated in Brazil carry distinct types of plasmid-mediated quinolone resistance genes. J Med Microbiol. 2013;62(Pt 9):1326-1331.
165	Bado I, Gutiérrez C, García-Fulgueiras V, et al. CTX-M-15 in combination with aac(6')-Ib-cr is the most prevalent mechanism of resistance both in Escherichia coli and Klebsiella pneumoniae, including K. pneumoniae ST258, in an ICU in Uruguay. J Glob Antimicrob Resist. 2016;6:5-9.
166	Botelho LA, Kraychete GB, Costa JL, et al. Widespread distribution of CTX-M and plasmid-mediated AmpC β-lactamases in Escherichia coli from Brazilian chicken meat. Mem Inst Oswaldo Cruz. 2015;110(2):249-254.
167	Dropa M, Lincopan N, Balsalobre LC, et al. Genetic background of novel sequence types of CTX-M-8- and CTX-M-15-producing Escherichia coli and Klebsiella pneumoniae from public wastewater treatment plants in São Paulo, Brazil. Environ Sci Pollut Res Int. 2016;23(5):4953-4958.
168	García-Fulgueiras V, Bado I, Mota MI, et al. Extended-spectrum β-lactamases and plasmid-mediated quinolone resistance in enterobacterial clinical isolates in the paediatric hospital of Uruguay. J Antimicrob Chemother. 2011;66(8):1725-1729.
169	Pallecchi L, Malossi M, Mantella A, et al. Detection of CTX-M-type beta-lactamase genes in fecal Escherichia coli isolates from healthy children in Bolivia and Peru. Antimicrob Agents Chemother. 2004;48(12):4556-4561.
170	Quijada-Martínez P, Flores-Carrero A, Labrador I, Araque M. Estudio clínico y microbiológico de la infección urinaria asociada a catéter, en los servicios de medicina interna de un hospital universitario venezolano [Clinical and microbiological study of catheter-associated urinary tract infections in internal medicine services of a Venezuelan university hospital]. Rev Peru Med Exp Salud Publica. …
171	Minarini LA, Gales AC, Palazzo IC, Darini AL. Prevalence of community-occurring extended spectrum beta-lactamase-producing Enterobacteriaceae in Brazil. Curr Microbiol. 2007;54(5):335-341.
172	Sartori L, Fernandes MR, Ienne S, et al. Draft genome sequences of two fluoroquinolone-resistant CTX-M-15-producing Escherichia coli ST90 (ST23 complex) isolated from a calf and a dairy cow in South America. J Glob Antimicrob Resist. 2017;11:145-147.
173	Marusinec R, Kurowski KM, Amato HK, et al. Caretaker knowledge, attitudes, and practices (KAP) and carriage of extended-spectrum beta-lactamase-producing E. coli (ESBL-EC) in children in Quito, Ecuador. Antimicrob Resist Infect Control. 2021;10(1):2.
174	Jones RN, Guzman-Blanco M, Gales AC, et al. Susceptibility rates in Latin American nations: report from a regional resistance surveillance program (2011). Braz J Infect Dis. 2013;17(6):672-681.
175	Adrianzén D, Arbizu A, Ortiz J, Samalvides F. Mortalidad por bacteriemia causada por Escherichia coli y Klebsiella spp. productoras de beta lactamasas de espectro extendido: cohorte retrospectiva en un hospital de Lima, Perú [Mortality caused by bacteremia Escherichia coli and Klebsiella spp. extended-spectrum beta-lactamase- producers: a retrospective cohort from a hospital in Lima, Peru]. Rev P…
176	Tedesco-Maiullari RM, Guevara A. Enterobatteri produttori di beta-lattamasi a spettro esteso in un ospedale in Venezuela [Enterobacteria producers of extended-spectrum beta-lactamase in a hospital from Venezuela]. Infez Med. 2012;20(2):93-99. Italian.
177	Di Conza JA, Badaracco A, Ayala J, Rodríguez C, Famiglietti A, Gutkind GO. β-lactamases produced by amoxicillin-clavulanate-resistant enterobacteria isolated in Buenos Aires, Argentina: a new blaTEM gene. Rev Argent Microbiol. 2014;46(3):210-217.
178	Da Silva KC, Cunha MP, Cerdeira L, et al. High-virulence CMY-2- and CTX-M-2-producing avian pathogenic Escherichia coli strains isolated from commercial turkeys. Diagn Microbiol Infect Dis. 2017;87(1):64-67.
179	Fernandes MR, Sellera FP, Moura Q, Gaspar VC, Cerdeira L, Lincopan N. International high-risk clonal lineages of CTX-M-producing Escherichia coli F-ST648 in free-roaming cats, South America. Infect Genet Evol. 2018;66:48-51.
180	Da Silva-Dias RC, Borges-Neto AA, D'Almeida-Ferraiuoli GI, de-Oliveira MP, Riley LW, Moreira BM. Prevalence of AmpC and other beta-lactamases in enterobacteria at a large urban university hospital in Brazil. Diagn Microbiol Infect Dis. 2008;60(1):79-87.
181	Ferreira JC, Penha Filho RA, Andrade LN, Berchieri A Jr, Darini AL. Detection of chromosomal bla(CTX-M-2) in diverse Escherichia coli isolates from healthy broiler chickens. Clin Microbiol Infect. 2014;20(10):623-626.
182	Quiles MG, Menezes LC, Bauab C, et al. Diagnosis of bacteremia in pediatric oncologic patients by in-house real-time PCR. BMC Infect Dis. 2015;15:283.
183	Dias RCB, Vieira MA, Moro AC, et al. Characterization of Escherichia coli obtained from patients undergoing peritoneal dialysis and diagnosed with peritonitis in a Brazilian centre. J Med Microbiol. 2019;68(9):1330-1340.
184	Ferreira CM, Ferreira WA, Almeida NC, Naveca FG, Barbosa Md. Extended-spectrum beta-lactamase-producing bacteria isolated from hematologic patients in Manaus, State of Amazonas, Brazil. Braz J Microbiol. 2011;42(3):1076-1084.
185	Rugini CL, Sobottka AM, Fuentefria DB. Occurrence and sensitivity profile of extended spectrum beta-lactamase-producing Enterobacteriaceae at a tertiary hospital in Southern Brazil. Rev Soc Bras Med Trop. 2015;48(6):692-698.
186	Oplustil CP, Nunes R, Mendes C; RESISTNET Group. Multicenter evaluation of resistance patterns of Klebsiella pneumoniae, Escherichia coli, Salmonella spp and Shigella spp isolated from clinical specimens in Brazil: RESISTNET Surveillance Program. Braz J Infect Dis. 2001;5(1):8-12.
187	Tosin I, Silbert S, Sader HS. The use of molecular typing to evaluate the dissemination of antimicrobial resistance among Gram-negative rods in Brazilian hospitals. Braz J Infect Dis. 2003;7(6):360-369.
188	Guevara N, Guzmán M, Merentes A, et al. Patrones de susceptibilidad antimicrobiana de bacterias gramnegativas aisladas de infecciones del tracto urinario en Venezuela: Resultados del estudio SMART 2009-2012 [Antimicrobial susceptibility patterns of Gram-negative bacteria isolated in urinary tract infections in Venezuela: Results of the SMART study 2009-2012]. Rev Chilena Infectol. 2015;32(6):639-…
189	Casellas JM, Tomé G, Bantar C, et al. Argentinean collaborative multicenter study on the in vitro comparative activity of piperacillin-tazobactam against selected bacterial isolates recovered from hospitalized patients. Diagn Microbiol Infect Dis. 2003;47(3):527-537.
190	Motta RN, Oliveira MM, Magalhães PS, et al. Plasmid-mediated extended-spectrum beta-lactamase-producing strains of Enterobacteriaceae isolated from diabetes foot infections in a Brazilian diabetic center. Braz J Infect Dis. 2003;7(2):129-134.
191	Rossi F, García P, Ronzon B, Curcio D, Dowzicky MJ. Rates of antimicrobial resistance in Latin America (2004-2007) and in vitro activity of the glycylcycline tigecycline and of other antibiotics. Braz J Infect Dis. 2008;12(5):405-415.
192	Casella T, Rodríguez MM, Takahashi JT, et al. Detection of blaCTX-M-type genes in complex class 1 integrons carried by Enterobacteriaceae isolated from retail chicken meat in Brazil. Int J Food Microbiol. 2015;197:88-91.
193	De Oliveira CF, Salla A, Lara VM, Rieger A, Horta JA, Alves SH. Prevalence of extended-spectrum beta-lactamases-producing microorganisms in nosocomial patients and molecular characterization of the SHV-type isolates. Braz J Microbiol. 2010;41(2):278-282.
194	Seki LM, Pereira PS, de Souza-Conceição M, et al. Molecular epidemiology of CTX-M producing Enterobacteriaceae isolated from bloodstream infections in Rio de Janeiro, Brazil: emergence of CTX-M-15. Braz J Infect Dis. 2013;17(6):640-646.
195	Salgado-Caxito M, Benavides JA, Munita JM, et al. Risk factors associated with faecal carriage of extended-spectrum cephalosporin-resistant Escherichia coli among dogs in Southeast Brazil. Prev Vet Med. 2021;190:105316.
196	Vignoli R, Varela G, Mota MI, et al. Enteropathogenic Escherichia coli strains carrying genes encoding the PER-2 and TEM-116 extended-spectrum beta-lactamases isolated from children with diarrhea in Uruguay. J Clin Microbiol. 2005;43(6):2940-2943.
197	Hernández E, Araque M, Millán Y, Millán B, Vielma S. Prevalencia de beta-lactamasa CTX-M-15 en grupos filogenéticos de Escherichia coli uropatógena aisladas en pacientes de la comunidad en Mérida, Venezuela [Prevalence of beta-lactamase CTX-M-15 in phylogenetic groups of uropathogenic Escherichia coli isolated from patients in the community of Merida, Venezuela]. Invest Clin. 2014;55(1):32-43. Sp…
198	Saba-Villarroel PM, Gutkind GO, Di Conza JA, Radice MA. First survey on antibiotic resistance markers in Enterobacteriaceae in Cochabamba, Bolivia. Rev Argent Microbiol. 2017;49(1):50-54.
199	Lago A, Fuentefria SR, Fuentefria DB. Enterobactérias produtoras de ESBL em Passo Fundo, estado do Rio Grande do Sul, Brasil [ESBL-producing enterobacteria in Passo Fundo, state of Rio Grande do Sul, Brazil]. Rev Soc Bras Med Trop. 2010;43(4):430-434. Portuguese.
200	Marchetti L, Buldain D, Gortari-Castillo L, Buchamer A, Chirino-Trejo M, Mestorino N. Pet and Stray Dogs as Reservoirs of Antimicrobial-Resistant Escherichia coli. Int J Microbiol. 2021;2021:6664557.
201	Wozniak A, Villagra NA, Undabarrena A, et al. Porin alterations present in non-carbapenemase-producing Enterobacteriaceae with high and intermediate levels of carbapenem resistance in Chile. J Med Microbiol. 2012;61(Pt 9):1270-1279.
202	Queiroz ML, Antunes P, Mourão J, Merquior VL, Machado E, Peixe LV. Characterization of extended-spectrum beta-lactamases, antimicrobial resistance genes, and plasmid content in Escherichia coli isolates from different sources in Rio de Janeiro, Brazil. Diagn Microbiol Infect Dis. 2012;74(1):91-94.
203	Salinas L, Loayza F, Cárdenas P, et al. Environmental Spread of Extended Spectrum Beta-Lactamase (ESBL) Producing Escherichia coli and ESBL Genes among Children and Domestic Animals in Ecuador. Environ Health Perspect. 2021;129(2):27007.
204	Bartoloni A, Sennati S, Di Maggio T, et al. Antimicrobial susceptibility and emerging resistance determinants (blaCTX-M, rmtB, fosA3) in clinical isolates from urinary tract infections in the Bolivian Chaco. Int J Infect Dis. 2016;43:1-6.
205	Vasques MR, Bello AR, Lamas C, Correa J, Pereira JA. β-lactamase producing enterobacteria isolated from surveillance swabs of patients in a cardiac intensive care unit in Rio de Janeiro, Brazil. Braz J Infect Dis. 2011;15(1):28-33.
206	Mendo-Lopez R, Jasso L, Guevara X, et al. Multidrug-Resistant Microorganisms Colonizing Lower Extremity Wounds in Patients in a Tertiary Care Hospital, Lima, Peru. Am J Trop Med Hyg. 2017;97(4):1045-1048.
207	Gaitán C SL, Espinal M PA. Caracterización molecular de Escherichia coli y Klebsiella pneumoniae productores de beta-lactamasas de espectro extendido en hospitales de la Región Caribe, Colombia [Molecular characterization of extended-spectrum beta-lactamases-producing Escherichia coli and Klebsiella pneumoniae in hospitals of the Caribean Region, Colombia]. Rev Chilena Infectol. 2009;26(3):239-24…
208	Sennati S, Santella G, Di Conza J, et al. Changing epidemiology of extended-spectrum β-lactamases in Argentina: emergence of CTX-M-15. Antimicrob Agents Chemother. 2012;56(11):6003-6005.
209	Ferreira JC, Penha-Filho RA, Andrade LN, Berchieri Junior A, Darini AL. Evaluation and characterization of plasmids carrying CTX-M genes in a non-clonal population of multidrug-resistant Enterobacteriaceae isolated from poultry in Brazil. Diagn Microbiol Infect Dis. 2016;85(4):444-448.
210	Abreu AG, Marques SG, Monteiro-Neto V, Gonçalves AG. Extended-spectrum β-lactamase-producing Enterobacteriaceae in community-acquired urinary tract infections in São Luís, Brazil. Braz J Microbiol. 2013;44(2):469-471.
211	Hawser SP, Bouchillon SK, Hoban DJ, et al. Low frequency of ertapenem-resistant intra-abdominal isolates of Escherichia coli from Latin America: susceptibility, ESBL-occurrence, and molecular characterisation (SMART 2008-2009). J Chemother. 2012;24(1):6-11.
212	Quinteros M, Radice M, Gardella N, et al. Extended-spectrum beta-lactamases in Enterobacteriaceae in Buenos Aires, Argentina, public hospitals. Antimicrob Agents Chemother. 2003;47(9):2864-2867.
213	Flamm RK, Sader HS, Jones RN. Ceftaroline activity tested against contemporary Latin American bacterial pathogens (2011). Braz J Infect Dis. 2014;18(2):187-195.
214	Nordberg V, Quizhpe-Peralta A, Galindo T, et al. High proportion of intestinal colonization with successful epidemic clones of ESBL-producing Enterobacteriaceae in a neonatal intensive care unit in Ecuador. PLoS One. 2013;8(10):e76597.
215	Fernandes MR, Sellera FP, Esposito F, Sabino CP, Cerdeira L, Lincopan N. Colistin-Resistant mcr-1-Positive Escherichia coli on Public Beaches, an Infectious Threat Emerging in Recreational Waters. Antimicrob Agents Chemother. 2017;61(7):e00234-17.
216	Redondo C, Chalbaud A, Alonso G. Frequency and diversity of CTX-M enzymes among extended-spectrum beta-lactamase-producing Enterobacteriaceae isolates from Caracas, Venezuela. Microb Drug Resist. 2013;19(1):42-47.
217	Villar HE, Jugo MB, Macan A, Visser M, Hidalgo M, Maccallini GC. Frequency and antibiotic susceptibility patterns of urinary pathogens in male outpatients in Argentina. J Infect Dev Ctries. 2014;8(6):699-704.
218	Moreno A, Bello H, Guggiana D, Domínguez M, González G. Extended-spectrum beta-lactamases belonging to CTX-M group produced by Escherichia coli strains isolated from companion animals treated with enrofloxacin. Vet Microbiol. 2008;129(1-2):203-208.
219	Pallecchi L, Bartoloni A, Fiorelli C, et al. Rapid dissemination and diversity of CTX-M extended-spectrum beta-lactamase genes in commensal Escherichia coli isolates from healthy children from low-resource settings in Latin America. Antimicrob Agents Chemother. 2007;51(8):2720-2725.
220	Báez J, Hernández-García M, Guamparito C, et al. Molecular characterization and genetic diversity of ESBL-producing Escherichia coli colonizing the migratory Franklin's gulls (Leucophaeus pipixcan) in Antofagasta, North of Chile. Microb Drug Resist. 2015;21(1):111-116.
221	Conte D, Palmeiro JK, da Silva Nogueira K, et al. Characterization of CTX-M enzymes, quinolone resistance determinants, and antimicrobial residues from hospital sewage, wastewater treatment plant, and river water. Ecotoxicol Environ Saf. 2017;136:62-69.
222	Nascimento T, Cantamessa R, Melo L, et al. International high-risk clones of Klebsiella pneumoniae KPC-2/CC258 and Escherichia coli CTX-M-15/CC10 in urban lake waters. Sci Total Environ. 2017;598:910-915.
223	Flores R, Albornoz C, Hurtado J, Montaño V, Santa-Cruz A. Enterobacterias productoras de B-lactamasas de espectro-extendido y plásmido-AmpC en aguas de riego, zona Maica, Cochabamba [Extended-spectrum B-lactamase and plasmid ampc B-lactamase-producing Enterobacteriaceae in water sources for irrigation in Maica's zone, Cochabamba]. Rev Cient Cienc Med. 2019;22(2):15-21. Spanish.
224	Guzman-Otazo J, Gonzales-Siles L, Poma V, et al. Diarrheal bacterial pathogens and multi-resistant Enterobacteria in the Choqueyapu River in La Paz, Bolivia. PLoS One. 2019;14(1):e0210735.
225	Ortega-Paredes D, Barba P, Mena-López S, Espinel N, Crespo V, Zurita J. High quantities of multidrug-resistant Escherichia coli are present in the Machángara urban river in Quito, Ecuador. J Water Health. 2020;18(1):67-76.
